# Supplementary material
Source: publisher figshare collection journal article supplement (https://gsapubs.figshare.com/ndownloader/files/30442971)
Supplement: Supplementary file 1 [file 30442971]

## Sheet: Sheet1
Sample Number	Cave (abbreviation)	Speleothem-layer	234U/238U measured	2s	234U/238U initial	2s	U-Th age (ka)	2s	Calculated from the data in the following study
1	Ma'ale-Deragot (MD)	MD(1)-3-A	1.1083	0.00117	1.13034	0.00157313	65.54	0.448	Vaks et al (2006)
2		MD(1)-8-A	1.14578	0.0007	1.14737	0.000729272	3.828	0.052	Vaks et al (2006)
3		MD(1)-8-A2	1.14075	0.00084	1.22916	0.00232426	172.465	1.477	Vaks et al (2006)
4		MD(1)-9-A	1.1008	0.00148	1.10902	0.00168825	27.749	0.284	Vaks et al (2006)
5		MD(1)-9-Bdown	1.1015	0.00122	1.11531	0.00164151	45.138	0.784	Vaks et al (2006)
6		MD(1)-9-C	1.10165	0.00039	1.13961	0.00110498	112.261	1.443	Vaks et al (2006)
7		MD(1)-9-Dmid	1.08569	0.00133	1.13206	0.00266897	153.039	1.659	Vaks et al (2006)
8		MD(1)-9-Ddown	1.08436	0.00128	1.1309	0.00258931	155.461	1.63	Vaks et al (2006)
9		MD(1)-10-Btop	1.09365	0.00178	1.13563	0.00321857	131.053	1.671	Vaks et al (2006)
10		MD(1)-10-B bottom	1.11067	0.00131	1.16122	0.00252758	133.109	1.359	Vaks et al (2006)
11		MD(1)-10-C1	1.09854	0.00176	1.15311	0.00398964	155.922	2.9	Vaks et al (2006)
12		MD(1)-10-C2	1.09489	0.00134	1.14798	0.00325662	157.218	2.79	Vaks et al (2006)
13		MD(1)-10-D-BS	1.03414	0.00183	1.11394	0.0217678	426.438	48.301	Vaks et al (2006)
14		MD(2)-1.1-A	1.05148	0.00059	1.1311	0.00728213	330.73	15.59	Vaks et al (2006)
15		MD(2)-1.1-low	1.00978	0.00091	1.03493	0.00638058	450.4	31.54	Vaks et al (2006)
16		MD(2)-2-A2	1.06491	0.00058	1.09527	0.0015352	135.76	2.54	Vaks et al (2006)
17	Tzavoa (TZ)	TZ-1-A1*	1.08328	0.00231	1.08695	0.00269455	15.276	1.15	Vaks et al (2006)
18		TZ-2-A1*	1.0961	0.00114	1.10203	0.00128992	21.181	0.276	Vaks et al (2006)
19		TZ-2-B top	1.09949	0.00079	1.11072	0.000944923	37.854	0.21	Vaks et al (2006)
20		TZ-2-B bottom	1.1077	0.0006	1.12429	0.000914399	50.678	0.632	Vaks et al (2006)
21		TZ-4-A1	1.10409	0.00133	1.11906	0.00172785	47.535	0.614	Vaks et al (2006)
22		TZ-4-A2	1.03744	0.0012	1.0533	0.00195297	124.965	1.624	Vaks et al (2006)
23		TZ-4-B1.1	1.05566	0.0019	1.08024	0.00333599	129.41	2.632	Vaks et al (2006)
24		TZ-4-B1.2	1.05819	0.0017	1.08376	0.00302334	128.883	2.434	Vaks et al (2006)
25		TZ-4-B2	1.06166	0.00194	1.09077	0.00361188	136.832	2.946	Vaks et al (2006)
26		TZ-4-C1	1.06458	0.00216	1.10087	0.00448503	157.781	3.897	Vaks et al (2006)
27		TZ-4-C2	1.0549	0.0014	1.08626	0.00283696	159.863	2.614	Vaks et al (2006)
28		TZ-4-D	1.05484	0.00092	1.08897	0.00198806	171.225	1.97	Vaks et al (2006)
29		TZ-4-E*	1.0639	0.0009	1.10597	0.00238013	178.992	2.963	Vaks et al (2006)
30		TZ-4-F	1.06297	0.00098	1.10556	0.00240641	182.802	2.559	Vaks et al (2006)
31		TZ-4-G	1.06165	0.00109	1.10175	0.00237794	177.286	2.013	Vaks et al (2006)
32		TZ-4-H(I)	1.06139	0.00411	1.09821	0.0078042	166.25	4.426	Vaks et al (2006)
33		TZ-4-H(II)	1.05345	0.00103	1.08727	0.00223311	173.478	2.235	Vaks et al (2006)
34		TZ-4-N	1.05227	0.00111	1.08858	0.00273963	186.634	3.429	Vaks et al (2006)
35		TZ-4-V	1.04775	0.00129	1.0806	0.00281374	185.227	2.793	Vaks et al (2006)
36		TZ-4-XY*	1.0529	0.0012	1.09252	0.0032686	197.795	4.473	Vaks et al (2006)
37		TZ-6-A1	1.14426	0.00111	1.15719	0.0013441	30.37	0.303	Vaks et al (2006)
38		TZ-6-A2	1.14167	0.00174	1.15517	0.00213173	32.215	0.515	Vaks et al (2006)
39		TZ-6-B1	1.12965	0.00104	1.14254	0.00125616	33.526	0.28	Vaks et al (2006)
40		TZ-6-B2	1.12521	0.00128	1.1381	0.00150893	34.662	0.249	Vaks et al (2006)
41		TZ-6-B3	1.12562	0.00094	1.13969	0.00126797	37.567	0.564	Vaks et al (2006)
42		TZ-6-C1.1	1.13073	0.00104	1.14632	0.00132363	39.856	0.386	Vaks et al (2006)
43		TZ-6-C1.2	1.13993	0.00124	1.1582	0.00152713	43.428	0.28	Vaks et al (2006)
44		TZ-6-C1.3	1.127	0.0009	1.14418	0.00114356	44.883	0.299	Vaks et al (2006)
45		TZ-6-C2	1.13084	0.00103	1.14932	0.0013485	46.743	0.41	Vaks et al (2006)
46		TZ-7	1.11032	0.00333	1.13029	0.00413085	58.863	0.538	Vaks et al (2006)
47		TZ-9-A1*	1.0409	0.0011	1.04263	0.00117699	14.687	0.252	Vaks et al (2006)
48		TZ-12-A1	1.07795	0.00109	1.08265	0.00118802	20.733	0.138	Vaks et al (2006)
49		TZ-12-A2	1.07419	0.00064	1.07984	0.000712176	25.953	0.104	Vaks et al (2006)
50		TZ-12-B	1.10252	0.0007	1.11113	0.000866228	28.542	0.342	Vaks et al (2006)
51		TZ-12-C	1.06157	0.00106	1.06709	0.00121672	30.398	0.325	Vaks et al (2006)
52		TZ-13-A1*	1.05146	0.0008	1.05476	0.000892763	21.985	0.268	Vaks et al (2006)
53		TZ-14-A(I)	1.12079	0.00067	1.12554	0.000787866	13.637	0.258	Vaks et al (2006)
54		TZ-14-A(II)*	1.11291	0.00099	1.1176	0.00108629	14.399	0.166	Vaks et al (2006)
55		TZ-14-BC	1.13853	0.00179	1.14495	0.0019582	16.035	0.208	Vaks et al (2006)
56		TZ-14-D	1.13603	0.00102	1.14272	0.00113064	16.977	0.15	Vaks et al (2006)
57		TZ-14-E	1.13578	0.00139	1.14255	0.00152453	17.206	0.162	Vaks et al (2006)
58		TZ-14-F	1.13693	0.00195	1.14384	0.00213385	17.431	0.21	Vaks et al (2006)
59		TZ-14-G	1.13887	0.00137	1.14616	0.00151877	18.106	0.186	Vaks et al (2006)
60		TZ-14-H	1.14784	0.00084	1.15596	0.00098577	18.924	0.226	Vaks et al (2006)
61		TZ-14-I	1.14721	0.00121	1.15529	0.00136511	18.917	0.202	Vaks et al (2006)
62		TZ-14-J	1.1499	0.00099	1.15817	0.00109555	18.992	0.114	Vaks et al (2006)
63		TZ-14-K	1.15179	0.00082	1.1606	0.000992842	19.952	0.276	Vaks et al (2006)
64		TZ-14-L*	1.14247	0.00101	1.1521	0.00113842	23.132	0.14	Vaks et al (2006)
65		TZ-15-B1.1	1.13973	0.00095	1.15286	0.00116799	31.77	0.298	Vaks et al (2006)
66		TZ-15-B1.2	1.11641	0.00104	1.12873	0.00127704	35.593	0.349	Vaks et al (2006)
67		TZ-15-B2.1	1.09937	0.00121	1.11042	0.00144259	37.318	0.314	Vaks et al (2006)
68		TZ-15-B2.2	1.11911	0.00128	1.13286	0.00152844	38.664	0.268	Vaks et al (2006)
69		TZ-15-C1	1.09666	0.00072	1.11042	0.000903913	47.077	0.261	Vaks et al (2006)
70		TZ-15-C2	1.09273	0.00108	1.10651	0.00132174	49.012	0.27	Vaks et al (2006)
71		TZ-15-D	1.10591	0.00106	1.12325	0.00131922	53.644	0.246	Vaks et al (2006)
72		TZ-15-E (I)	1.10931	0.0008	1.12909	0.00114029	58.84	0.536	Vaks et al (2006)
73		TZ-15-E (II)	1.09448	0.00069	1.113	0.00106574	63.332	0.753	Vaks et al (2006)
74		TZ-15-F1	1.11714	0.00121	1.13951	0.00186697	61.846	1.08	Vaks et al (2006)
75		TZ-15-F2	1.09258	0.00092	1.11079	0.00127312	63.518	0.55	Vaks et al (2006)
76		TZ-15-G1 (I)	1.09031	0.00134	1.10804	0.00179232	63.409	0.62	Vaks et al (2006)
77		TZ-15-G1 (II)	1.08921	0.00121	1.10752	0.00165887	66.043	0.66	Vaks et al (2006)
78		TZ-15-G3	1.07974	0.00093	1.09622	0.00122937	66.476	0.394	Vaks et al (2006)
79		TZ-15-I	1.07569	0.00082	1.09238	0.00108326	70.486	0.316	Vaks et al (2006)
80		TZ-15-K	1.07796	0.00139	1.09497	0.00187292	69.844	0.669	Vaks et al (2006)
81		TZ-15-L	1.06786	0.0007	1.08332	0.00095465	72.633	0.404	Vaks et al (2006)
82		TZ-15-M	1.07751	0.00097	1.09563	0.00132511	74.32	0.475	Vaks et al (2006)
83		TZ-15-N	1.03126	0.00074	1.03896	0.00100935	77.939	0.79	Vaks et al (2006)
84		TZ-16-A1	1.06342	0.00098	1.07221	0.00118073	45.925	0.318	Vaks et al (2006)
85		TZ-16-A2	1.0764	0.00179	1.09008	0.00225992	58.274	0.587	Vaks et al (2006)
86		TZ-16-B	1.07916	0.0005	1.09389	0.000682496	60.396	0.337	Vaks et al (2006)
87		TZ-16-C	1.07532	0.00187	1.08919	0.00239952	59.787	0.735	Vaks et al (2006)
88		TZ-16-D1	1.07695	0.00099	1.09151	0.00128796	61.3	0.428	Vaks et al (2006)
89		TZ-16-E	1.08005	0.00077	1.09528	0.00101314	61.612	0.359	Vaks et al (2006)
90		TZ-16-F	1.07376	0.00108	1.08809	0.00139094	62.827	0.406	Vaks et al (2006)
91		TZ-19-A1*	1.03896	0.00132	1.04293	0.00152602	34.371	0.588	Vaks et al (2006)
92		TZ-19-B*	1.09412	0.00124	1.10135	0.00140342	26.184	0.238	Vaks et al (2006)
93		TZ-19-C1*	1.07633	0.00194	1.08373	0.00225402	32.747	0.532	Vaks et al (2006)
94		TZ-19-D1*	1.11346	0.00098	1.12509	0.00118121	34.527	0.285	Vaks et al (2006)
95		TZ-19-D2*	1.08403	0.00098	1.09488	0.00119391	42.952	0.326	Vaks et al (2006)
96		TZ-19-E1*	1.07773	0.00086	1.08816	0.00106554	44.531	0.362	Vaks et al (2006)
97		TZ-19-E2*	1.08064	0.00136	1.09238	0.00168067	48.082	0.47	Vaks et al (2006)
98		TZ-19-G1	1.1112	0.0014	1.12711	0.00174689	47.316	0.408	Vaks et al (2006)
99		TZ-19-G2	1.11778	0.00118	1.13483	0.00148418	47.833	0.35	Vaks et al (2006)
100		TZ-19-H3	1.127	0.00267	1.15075	0.00368092	60.647	1.201	Vaks et al (2006)
101		TZ-19-I	1.06581	0.00077	1.08374	0.00126256	85.236	1.195	Vaks et al (2006)
102		TZ-19-J	1.06181	0.00175	1.07743	0.00242667	79.725	1.071	Vaks et al (2006)
103		TZ-21-AS-17	1.1275	0.00198	1.1421	0.00256908	38.371	0.902	Vaks et al (2006)
104		TZ-21-AS-16	1.12631	0.00146	1.15131	0.00260474	63.899	2.001	Vaks et al (2006)
105		TZ-21-AS-15	1.10854	0.00176	1.13415	0.00358097	74.959	3.707	Vaks et al (2006)
106		TZ-21-AS-14*	1.11115	0.00142	1.14077	0.00216565	83.591	0.923	Vaks et al (2006)
107		TZ-21-AS-13(I)*	1.09581	0.00148	1.12433	0.00225123	92.197	0.941	Vaks et al (2006)
108		TZ-21-AS-13(II)*	1.10075	0.00102	1.13225	0.00179112	96.245	1.21	Vaks et al (2006)
109		TZ-21-AS-12	1.10631	0.00133	1.14877	0.0025087	118.894	1.54	Vaks et al (2006)
110		TZ-21-AS-11	1.08107	0.00053	1.12647	0.00135477	157.347	1.477	Vaks et al (2006)
111		TZ-21-AS-21*	1.09328	0.00098	1.14649	0.00220805	159.689	1.616	Vaks et al (2006)
112		TZ-21-E	1.08499	0.0009	1.13246	0.00203799	157.004	1.697	Vaks et al (2006)
113		TZ-21-F	1.09268	0.00115	1.14612	0.00251518	161.085	1.7	Vaks et al (2006)
114		TZ-21-G1	1.06827	0.00071	1.11062	0.00192201	170.753	2.468	Vaks et al (2006)
115		TZ-21-G3	1.08024	0.00099	1.12884	0.00221453	167.555	1.716	Vaks et al (2006)
116		TZ-21-H	1.06982	0.00191	1.11314	0.00442376	170.803	4.154	Vaks et al (2006)
117		TZ-21-P	1.09281	0.00106	1.15299	0.00264851	176.851	2.084	Vaks et al (2006)
118		TZ-21-Q	1.08453	0.00115	1.14409	0.00291282	188.697	2.339	Vaks et al (2006)
119		TZ-22(1)-A1*	1.13368	0.00086	1.14473	0.00102111	28.113	0.22	Vaks et al (2006)
120		TZ-22(1)-A2	1.12315	0.00118	1.14288	0.00161013	52.578	0.597	Vaks et al (2006)
121		TZ-22(1)-C1.1	1.07884	0.00146	1.12091	0.00284559	151.293	1.775	Vaks et al (2006)
122		TZ-22(1)-C1.2	1.07383	0.00091	1.11473	0.00197895	155.962	1.742	Vaks et al (2006)
123		TZ-22(1)-C2.3	1.07858	0.00051	1.12386	0.0011483	160.987	0.984	Vaks et al (2006)
124		TZ-22(1)-D	1.07947	0.00098	1.12674	0.00325142	165.16	4.713	Vaks et al (2006)
125		TZ-22(1)-E	1.06222	0.00101	1.10182	0.00218977	174.259	1.866	Vaks et al (2006)
126		TZ-22(1)-F2	1.05603	0.00109	1.0922	0.00236372	176.211	2.188	Vaks et al (2006)
127		TZ-22(1)-G1	1.10212	0.00096	1.16647	0.0025239	172.911	2.038	Vaks et al (2006)
128		TZ-22(1)-H1	1.06064	0.00191	1.09989	0.00399219	176.595	2.996	Vaks et al (2006)
129		TZ-22(1)-H2	1.06203	0.00089	1.10133	0.00210677	173.626	2.28	Vaks et al (2006)
130		TZ-22(1)-J1	1.07239	0.00156	1.12632	0.00388226	196.989	3.249	Vaks et al (2006)
131		TZ-22(1)-K1	1.02096	0.00124	1.03661	0.0024535	197.287	2.782	Vaks et al (2006)
132		TZ-22(1)-K3	1.02586	0.0016	1.04613	0.00339889	204.762	4.178	Vaks et al (2006)
133		TZ-22(1)-L1(I)	1.0327	0.00204	1.05761	0.00433812	200.364	4.569	Vaks et al (2006)
134		TZ-22(1)-L1(II)	1.04126	0.00558	1.07129	0.0114243	193.49	8.834	Vaks et al (2006)
135		TZ-22(1)-L2	1.039	0.00155	1.06765	0.00364532	194.897	5.001	Vaks et al (2006)
136		TZ-22(1)-M	1.03569	0.00201	1.0622	0.00433188	196.544	4.713	Vaks et al (2006)
137		TZ-22(2)-A1	1.12499	0.00077	1.13606	0.00129429	30.031	1.186	Vaks et al (2006)
138		TZ-22(2)-B	1.12149	0.00099	1.14225	0.00143259	55.824	0.68	Vaks et al (2006)
139		TZ-22(2)-C	1.0844	0.00229	1.10568	0.00322796	79.561	1.207	Vaks et al (2006)
140		TZ-22(2)-D1	1.08647	0.00094	1.12954	0.00208736	143.009	1.855	Vaks et al (2006)
141		TZ-22(2)-D2	1.07894	0.00134	1.11607	0.00265682	136.386	2.093	Vaks et al (2006)
142	Izzim (IZ)	IZ-1-A2	1.01512	0.00095	1.04334	0.00545995	372.63	22.28	Vaks et al (2010)
143		IZ-1-A3	1.00734	0.00142	1.03017	0.0133521	500.08	85.33	Vaks et al (2010)
144	Hol-Zakh (HZ)	HZ-1-A	0.95261	0.00168	0.93172	0.00211338	129.22	1.592	Vaks et al (2010)
145		HZ-1-A1	0.96041	0.00143	0.943382	0.00186954	126.582	1.097	Vaks et al (2010)
146		HZ-1-A2	0.95025	0.0009	0.928119	0.000987302	130.205	1.541	Vaks et al (2010)
147		HZ-1-B	0.93024	0.00099	0.898793	0.000959468	131.66	1.667	Vaks et al (2010)
148		HZ-2-A	0.93652	0.00139	0.908008	0.00123569	131.259	2.995	Vaks et al (2010)
149		HZ-2-B(I)	0.95356	0.00126	0.931566	0.00126477	137.182	3.061	Vaks et al (2010)
150		HZ-2-B(II)	0.96693	0.00141	0.951373	0.00150777	136.42	4.116	Vaks et al (2010)
151		HZ-3(2)-A	0.94994	0.00191	0.927032	0.00174756	133.317	5.027	Vaks et al (2010)
152		HZ-3(2)-B1	0.92278	0.00134	0.887422	0.00108213	133.386	2.739	Vaks et al (2010)
153		HZ-3(2)-B2	0.99703	0.00138	0.995769	0.00193973	125.193	2.186	Vaks et al (2010)
154		HZ-3(2)-C1	0.9705	0.00153	0.948083	0.00186466	200.001	5.645	Vaks et al (2010)
155		HZ-3(2)-C2	0.96496	0.00132	0.934349	0.00154562	222.15	5	Vaks et al (2010)
156		HZ-3(2)-D	1.00906	0.00228	1.01823	0.00514752	247.4	10.82	Vaks et al (2010)
157		HZ-3(2)-E	0.98493	0.00185	0.959574	0.00206752	349.14	25.43	Vaks et al (2010)
158		HZ-3(5)-A1(I)	0.9366	0.00107	0.913067	0.00106989	111.692	1.617	Vaks et al (2010)
159		HZ-3(5)-A1(II)	0.93991	0.00116	0.91241	0.0011745	133.328	2.086	Vaks et al (2010)
160		HZ-3(5)-A2.1	0.93593	0.00131	0.906574	0.00141595	133.459	1.872	Vaks et al (2010)
161		HZ-3(5)-A2.2	0.95327	0.00089	0.932446	0.00107163	130.397	1.126	Vaks et al (2010)
162		HZ-3(5)-A3	0.93151	0.00076	0.902123	0.000721506	126.324	1.318	Vaks et al (2010)
163		HZ-3(5)-A5	1.01206	0.0011	1.01722	0.0016776	126.125	2.187	Vaks et al (2010)
164		HZ-3(5)-B	0.96631	0.0009	0.942768	0.00113295	187.491	2.448	Vaks et al (2010)
165	Makhtesh-ha-Qatan (MKTC)	MKTC-4-A	1.18911	0.0083516	1.28091	0.0175683	140	6.5	Vaks et al (2010)
166		MKTC-5-A	1.10959	0.0078672	1.15924	0.0154055	132.2	8.822	Vaks et al (2010)
167		MKTC-5-C	1.23165	0.00201	1.36125	0.00699203	157.214	3.778	Vaks et al (2010)
168		MKTC-5-H1	1.17163	0.00131	1.39626	0.013059	296.051	8.958	Vaks et al (2010)
169		MKTC-5-H2	1.17871	0.00181	1.42133	0.0191257	303.452	12.473	Vaks et al (2010)
170		MKTC-5-H9	1.23056	0.00169	1.60984	0.0329415	344.154	16.51	Vaks et al (2010)
171	Ashalim (ASH)	ASH-11-A1.1	1.03981	0.00095	1.05539	0.00160033	116.865	1.779	Vaks et al (2010)
172		ASH-11-A1.2	1.02781	0.00078	1.03944	0.00126657	123.58	1.44	Vaks et al (2010)
173		ASH-11-A2.1	1.0434	0.00157	1.06221	0.00328266	127.389	5.869	Vaks et al (2010)
174		ASH-11-A2.2	1.02947	0.00085	1.05237	0.0027919	203.423	8.654	Vaks et al (2010)
175		ASH-11-A2.3	1.03011	0.00083	1.05221	0.00194658	194.775	3.437	Vaks et al (2010)
176		ASH-11-A2.4	1.0271	0.0006	1.04969	0.00183438	214.486	5.228	Vaks et al (2010)
177		ASH-33-A1	1.03892	0.00209	1.05412	0.00337666	116.665	3.074	Vaks et al (2010)
178		ASH-33-A2	1.02948	0.00191	1.04185	0.00313458	123.974	3.576	Vaks et al (2010)
179		ASH-33-B1	1.02585	0.00103	1.03746	0.00174645	131.218	2.399	Vaks et al (2010)
180		ASH-33-B2	1.02745	0.00088	1.03954	0.00152773	129.141	2.327	Vaks et al (2010)
181		ASH-33-B3	1.02453	0.00087	1.03535	0.00154672	129.239	2.934	Vaks et al (2010)
182		ASH-33-B4	1.02456	0.00138	1.03522	0.00233951	127.518	3.623	Vaks et al (2010)
183		ASH-33-C1	1.0167	0.0008	1.02955	0.00191466	201.874	5.976	Vaks et al (2010)
184		ASH-33-C2	1.01826	0.00078	1.03211	0.002003	199.681	6.956	Vaks et al (2010)
185		ASH-33-D1	1.01834	0.00088	1.03255	0.00199704	203.035	4.726	Vaks et al (2010)
186		ASH-33-D2	1.01839	0.00117	1.03314	0.00249348	208.345	4.112	Vaks et al (2010)
187		ASH-33-E1.1	1.01819	0.00061	1.03274	0.00143421	207.915	3.635	Vaks et al (2010)
188		ASH-33-E1.2	1.01996	0.0006	1.03651	0.00158245	213.625	4.7	Vaks et al (2010)
189		ASH-33-E2.1	1.01997	0.00073	1.03698	0.00164433	218.038	2.797	Vaks et al (2010)
190		ASH-33-E2.2(I)	1.02737	0.0011	1.0481	0.00227354	199.467	2.505	Vaks et al (2010)
191		ASH-33-E22(II)	1.02247	0.00081	1.03951	0.00188948	199.69	4.165	Vaks et al (2010)
192		ASH-33-E22(III)	1.02368	0.00247	1.04153	0.00483188	198.78	4.256	Vaks et al (2010)
193		ASH-34-A1	1.042	0.00078	1.05869	0.00137557	118.38	1.722	Vaks et al (2010)
194		ASH-34-A2	1.05737	0.00108	1.08121	0.00195588	122.944	1.861	Vaks et al (2010)
195		ASH-34-B1	1.046	0.00069	1.06589	0.00128117	127.162	1.572	Vaks et al (2010)
196		ASH-34-B2	1.05782	0.00106	1.08414	0.00195171	132.719	1.721	Vaks et al (2010)
197		ASH-34-C1	1.02963	0.00093	1.05205	0.00211732	199.324	3.288	Vaks et al (2010)
198		ASH-34-C2	1.02501	0.00066	1.04403	0.00171411	200.106	4.437	Vaks et al (2010)
199		ASH-34-C3(I)	1.02945	0.0007	1.05072	0.00162463	192.317	2.924	Vaks et al (2010)
200		ASH-34-C3 (II)	1.02299	0.00095	1.03915	0.00238661	188.373	6.944	Vaks et al (2010)
201		ASH-34-C3 (III)	1.02689	0.00231	1.0466	0.00457331	194.581	4.323	Vaks et al (2010)
202	Even-Sid-Ramon (ESID)	ESID-2-A1.1	1.09346	0.00132	1.11976	0.00215786	87.728	1.378	Vaks et al (2010)
203		ESID-2-A1.2	1.06844	0.00126	1.12229	0.00509146	205.363	8.215	Vaks et al (2010)
204		ESID-2-A2	1.06505	0.00061	1.1486	0.00495261	292.281	8.473	Vaks et al (2010)
205		ESID-2-B	1.05601	0.00068	1.24105	0.037521	516.397	50.562	Vaks et al (2010)
206		ESID-7(1)-A1+A2	1.05006	0.00104	1.07302	0.00216002	133.588	3.115	Vaks et al (2010)
207		ESID-7(1)-A3	1.02994	0.0021	1.11083	0.0252781	463.086	55.351	Vaks et al (2010)
208		ESID-7(1)-B	1.02007	0.00402	1.07421	0.0364358	462.677	98.784	Vaks et al (2010)
209		ESID-7(3)-A1	1.04257	0.0073076	1.0783	0.0171075	215.6	16.5	Vaks et al (2010)
210		ESID-7(3)-B	1.01369	8e-05	1.0324	0.00101175	304.86	8.978	Vaks et al (2010)
211		ESID-11-A	1.05595	0.00196	1.26908	0.172481	555.691	201.308	Vaks et al (2010)
212	Ma'ale-Meishar (MMR)	MMR-7-A1.1	1.07182	0.00116	1.09865	0.00193011	112.298	1.208	Vaks et al (2010)
213		MMR-7-A1.2	1.07082	0.00133	1.09681	0.00214644	110.607	1.2	Vaks et al (2010)
214		MMR-7-A3.1	1.06428	0.00203	1.08931	0.00331172	116.361	1.946	Vaks et al (2010)
215		MMR-7-A3.2	1.07651	0.00106	1.1326	0.00295146	194.585	2.973	Vaks et al (2010)
216		MMR-7(2)-A1	1.07295	0.00199	1.10259	0.00334037	120.658	1.868	Vaks et al (2010)
217		MMR-7(2)-A2	1.07816	0.007635	1.11203	0.0127537	127.4	5.71	Vaks et al (2010)
218		MMR-7(2)-B	1.06326	0.00136	1.11229	0.00540077	203.037	9.407	Vaks et al (2010)
219		MMR-8-A	1.06865	0.00119	1.12027	0.003392	198.401	3.845	Vaks et al (2010)
220		MMR-8-B	1.06427	0.00092	1.11508	0.00255071	206.128	2.777	Vaks et al (2010)
221		MMR-13-A	1.06167	0.00303	1.09108	0.00552145	137.969	4.064	Vaks et al (2010)
222		MMR-13-B1	1.06027	0.00141	1.08568	0.00277012	124.483	3.161	Vaks et al (2010)
223		MMR-13-B2	1.05825	0.00141	1.08475	0.00327056	132.657	5.089	Vaks et al (2010)
224		MMR-13-C	1.05825	0.00153	1.08654	0.00311869	140.06	3.457	Vaks et al (2010)
225		MMR-13-E	1.06014	0.00126	1.08734	0.00248223	132.041	2.642	Vaks et al (2010)
226		MMR-13-F	1.06593	0.00075	1.09591	0.00168412	132.609	2.188	Vaks et al (2010)
227		MMR-13-G	1.07034	0.00152	1.10204	0.00340249	131.618	4.152	Vaks et al (2010)
228		MMR-13-H	1.07206	0.00139	1.10314	0.00276064	126.881	2.645	Vaks et al (2010)
229		MMR-13-I	1.07753	0.00093	1.11224	0.00189806	130.894	1.73928	Vaks et al (2010)
230	Shizafon (SHACH)	SHACH-1-A	1.02498	0.00117	1.06561	0.00530005	341.67	11.998	Vaks et al (2010)
231		SHACH-1-B	1.0115	0.00114	1.02951	0.00451121	333.408	18.959	Vaks et al (2010)
232		SHACH-3-A	1.03883	0.00105	1.10492	0.00658237	351.688	12.622	Vaks et al (2010)
233		SHACH-3-B	1.02417	0.00217	1.08186	0.0225346	431.638	64.736	Vaks et al (2010)
234	Ktora Cracks (KTO)	KTO-1(1)-A1	1.043	0.0073004	1.06358	0.0119831	138.4	6.6	Vaks et al (2010)
235		KTO-1(1)-A2	1.02516	0.00082	1.06208	0.00351737	319.584	8.51	Vaks et al (2010)
236	Soreq (SQ)	SO-38-C1	1.02557	0.000837674	1.02557	0.000838622	0.08	0.0105	Grant et al 2012
237		SO-38-C2	1.02557	0.000837674	1.02557	0.000838504	0.091	0.0085	Grant et al 2012
238		SO-38-C3	1.02931	0.000772951	1.02932	0.000774559	0.186	0.0145	Grant et al 2012
239		SO-32-B1	1.08593	0.00084	1.08596	0.00085085	0.118734	0.0435	Grant et al 2012
240		SO-32-B2	1.0929	0.00181	1.09296	0.00182069	0.215	0.0365	Grant et al 2012
241		SO-32-B3	1.08979	0.00094	1.08985	0.000943951	0.254036	0.0129	Grant et al 2012
242		SO-57-1	1.06046	0.0014	1.0693	0.00181811	48.306	1.089	Grant et al 2012
243		SO-57-2	1.06284	0.00133424	1.07309	0.00176834	53.455	1.048	Grant et al 2012
244		SO-57-3	1.03182	0.00251331	1.04014	0.00334897	82.261	1.567	Grant et al 2012
245		SO-57-4	1.0618	0.00220773	1.08389	0.00340302	108.125	1.713	Grant et al 2012
246		SO-57-5	1.02712	0.00143589	1.03905	0.00237121	129.034	2.749	Grant et al 2012
247		SO-55-1	1.05681	0.00087	1.06616	0.0010943	53.8961	0.434	Grant et al 2012
248		SO-55-2	1.04066	0.00173	1.05228	0.00238137	88.9453	1.062	Grant et al 2012
249		SO-55-3	1.05346	0.00141663	1.07285	0.00242746	109.485	2.414	Grant et al 2012
250		SO-55-4	1.05925	0.00151122	1.0848	0.00268258	126.827	2.169	Grant et al 2012
251		SO-55-5	1.04866	0.00102919	1.07406	0.00251131	148.59	4.514	Grant et al 2012
252		SO-56-1	1.04752	0.00219	1.06935	0.00357261	133.768	1.92	Grant et al 2012
253		SO-56-2	1.05444	0.00279	1.08507	0.00515238	157.934	3.296	Grant et al 2012
254		2a-1	1.07327	0.00248	1.07872	0.00278161	25.4	0.526	Grant et al 2012
255		2a-2	1.07233	0.00184	1.07806	0.00212799	26.98	0.6445	Grant et al 2012
256		2b-1	1.05789	0.00121	1.06557	0.00163524	44.05	1.429	Grant et al 2012
257		2b-2	1.06632	0.00222	1.07561	0.00273866	46.38	0.972	Grant et al 2012
258		SO 1-4-1	1.03551	0.00231	1.04061	0.00281571	47.458	1.517	Grant et al 2012
259		SO 1-4-2	1.07173	0.00174	1.08335	0.0021712	53.1173	0.634	Grant et al 2012
260		SO-60-1	1.1179	0.0049	1.14355	0.00606438	69.658	0.242	Grant et al 2012
261		SO-60-2	1.1396	0.00171	1.17068	0.00269228	71.123	1.247	Grant et al 2012
262		SO-60-3	1.15402	0.00101	1.18842	0.00158708	71.333	0.66	Grant et al 2012
263		SO 60-4	1.1254	0.00093	1.16046	0.0022182	87.239	2.267	Grant et al 2012
264		SO-60-5	1.1396	0.00171	1.18034	0.00316161	90.592	1.869	Grant et al 2012
265		SO 60-6	1.12635	0.00244	1.17696	0.00457715	119.183	2.319	Grant et al 2012
266		SO-60-7	1.10826	0.000775171	1.16539	0.00271853	149.95	3.282	Grant et al 2012
267		SO-58-1	1.06791	0.0018476	1.0756	0.00215497	37.932	0.46	Grant et al 2012
268		SO-58-2	1.03865	0.00167	1.04473	0.0020113	51.7295	0.62	Grant et al 2012
269		SO-54-1	1.06309	0.00102111	1.07779	0.00140842	74.077	0.68	Grant et al 2012
270		SO-54-2	1.05803	0.000926634	1.07879	0.00196123	108.214	3.157	Grant et al 2012
271		SO-54-3	1.03606	0.00242395	1.05212	0.00391041	130.305	2.7635	Grant et al 2012
272		2-6-1	1.02931	0.00145	1.0294	0.00146089	1.025	0.0805	Grant et al 2012
273		2-6-2	1.02859	0.00099	1.0287	0.00100444	1.376	0.1305	Grant et al 2012
274		2-6-3	1.03124	0.00081	1.03137	0.00082123	1.475	0.0885	Grant et al 2012
275		2-6-4	1.03288	0.00087	1.03302	0.000881863	1.538	0.0865	Grant et al 2012
276		2-6-5	1.03359	0.00122	1.03376	0.00125159	1.782	0.2665	Grant et al 2012
277		2-6-6	1.02976	0.00249	1.02991	0.00251332	1.814	0.1245	Grant et al 2012
278		2-6-7	1.02791	0.00165	1.02806	0.00167009	1.846	0.1445	Grant et al 2012
279		2-6-8	1.03047	0.00134	1.03066	0.00136133	2.18326	0.1505	Grant et al 2012
280		119-5-1	1.06662	0.000905732	1.06701	0.000934351	2.0666	0.1231	Grant et al 2012
281		119-5-2	1.05905	0.00148689	1.05951	0.00153363	2.73109	0.2094	Grant et al 2012
282		119-5-3	1.05584	0.00184311	1.05644	0.0018856	3.79583	0.1417	Grant et al 2012
283		119-5-4	1.07382	0.000961754	1.07514	0.00100799	6.27257	0.1367	Grant et al 2012
284		119-5-5	1.06793	0.000662164	1.06949	0.000739665	8.03033	0.3172	Grant et al 2012
285		119-5-6	1.07273	0.00115293	1.07443	0.0012943	8.17051	0.544	Grant et al 2012
286		119-5-7	1.06579	0.00103367	1.06766	0.00108803	9.89924	0.1309	Grant et al 2012
287		119-5-8	1.07588	0.00150472	1.07856	0.00167953	12.2819	0.5479	Grant et al 2012
288		119-5-9	1.07974	0.0014518	1.08272	0.00160404	12.9612	0.4195	Grant et al 2012
289		119-5-10	1.06309	0.00132997	1.06833	0.00159722	28.2692	0.811	Grant et al 2012
290		HT-11-1	1.0964	0.00156	1.09708	0.00165645	2.48121	0.3115	Grant et al 2012
291		HT-11-2	1.09915	0.00233	1.09988	0.00240309	2.581	0.1985	Grant et al 2012
292		HT-11-3	1.10006	0.00232	1.10101	0.00242829	3.329	0.3025	Grant et al 2012
293		HT-11-4	1.09821	0.00159	1.09926	0.00167169	3.76871	0.2305	Grant et al 2012
294		HT-11-5	1.10543	0.00124105	1.10676	0.00132204	4.437	0.2165	Grant et al 2012
295		HT-9-1	1.07657	0.00104	1.07727	0.00105646	3.2012	0.0321	Grant et al 2012
296		HT-9-2	1.05991	0.00363	1.06078	0.00369681	5.10658	0.0817	Grant et al 2012
297		HT-9-3	1.09743	0.00115	1.09987	0.00120462	8.75027	0.0915	Grant et al 2012
298		HT-9-4	1.09743	0.00115	1.0999	0.00120098	8.84213	0.0775	Grant et al 2012
299		HT-9-5	1.11861	0.00107	1.12243	0.00117039	11.2193	0.1905	Grant et al 2012
300		HT-9-6	1.12341	0.00121	1.12813	0.00129115	13.2785	0.0963	Grant et al 2012
301		HT-10-1	1.12493	0.00094	1.12779	0.00100841	8	0.1299	Grant et al 2012
302		HT-10-2	1.0869	0.00126	1.08905	0.00134524	8.64141	0.2149	Grant et al 2012
303		HT-14-1	1.08366	0.00181	1.08583	0.00189743	9.05128	0.1671	Grant et al 2012
304		HT-14-2	1.08366	0.00181	1.08587	0.00189405	9.23494	0.1491	Grant et al 2012
305		HT-14-3	1.0988	0.00166832	1.10204	0.00181265	11.43	0.3105	Grant et al 2012
306		HT-18-1	1.13876	0.00189	1.19915	0.00339129	127.832	1.206	Grant et al 2012
307		HT-18-2	1.13855	0.00132	1.21518	0.00308698	155.764	1.705	Grant et al 2012
308		11-24-1	1.01764	0.00106	1.0179	0.00107926	5.2265	0.0688	Grant et al 2012
309		11-24-2	1.02128	0.00061	1.0216	0.000622472	5.33427	0.0525	Grant et al 2012
310		11-24-3	1.02233	0.00134	1.02267	0.0013638	5.42262	0.0485	Grant et al 2012
311		11-24-4	1.02367	0.000941419	1.02404	0.000965971	5.54427	0.1425	Grant et al 2012
312		11-24-5	1.02003	0.00189575	1.02035	0.00193469	5.63362	0.1481	Grant et al 2012
313		11-24-6	1.02389	0.000802277	1.02428	0.000840064	5.70981	0.3604	Grant et al 2012
314		11-24-7	1.02011	0.000958387	1.02044	0.000976827	5.74986	0.0474	Grant et al 2012
315		11-24-8	1.01732	0.00100459	1.0176	0.00102541	5.79582	0.0851	Grant et al 2012
316		11-24-9	1.01778	0.000854985	1.01808	0.000877205	5.95768	0.1507	Grant et al 2012
317		11-24-10	1.02511	0.00088133	1.02555	0.000904655	6.13674	0.1095	Grant et al 2012
318		11-24-11	1.02032	0.00171	1.02068	0.00174596	6.25683	0.0933	Grant et al 2012
319		11-24-12	1.02049	0.000625067	1.02086	0.000644812	6.29239	0.1447	Grant et al 2012
320		11-24-12	1.01709	0.00103	1.0174	0.00105231	6.42562	0.0699	Grant et al 2012
321		11-24-14	1.01757	0.00116466	1.01789	0.0011899	6.44462	0.0757	Grant et al 2012
322		11-24-15	1.02214	0.000925716	1.02256	0.000952155	6.58533	0.1419	Grant et al 2012
323		11-24-16	1.01964	0.000691225	1.02001	0.000710777	6.6528	0.1137	Grant et al 2012
324		11-24-17	1.01697	0.000865693	1.0173	0.00088568	6.70782	0.0699	Grant et al 2012
325		11-24-18	1.01816	0.000810737	1.0185	0.000831825	6.71319	0.1063	Grant et al 2012
326		11-27-1	1.05533	0.00184	1.06699	0.00244024	67.6387	1.123	Grant et al 2012
327		11-27-2	1.063	0.00258	1.07633	0.0033713	67.92	1.137	Grant et al 2012
328		11-27-3	1.06007	0.00624	1.07308	0.00810799	69.345	2.502	Grant et al 2012
329		11-27-4	1.05594	0.00162	1.06807	0.00239155	69.42	2.185	Grant et al 2012
330		11-27-5	1.05584	0.00184	1.06797	0.00253718	69.5379	1.549	Grant et al 2012
331		11-27-6	1.05572	0.00286	1.06868	0.00404315	73.9692	2.669	Grant et al 2012
332		11-27-7	1.04911	0.00093	1.06126	0.00127913	78.243	0.687	Grant et al 2012
333		11-27-8	1.05039	0.00191	1.063	0.00258445	79.033	1.103	Grant et al 2012
334		11-27-9	1.03603	0.00153	1.04521	0.00225763	80.2911	2.644	Grant et al 2012
335		11-27-10	1.03019	0.00104	1.0379	0.00148281	80.505	1.653	Grant et al 2012
336		11-27-11	1.0315	0.00244	1.03956	0.00317661	80.6131	1.004	Grant et al 2012
337		11-27-12	1.04094	0.00204	1.05169	0.00274554	82.4904	1.163	Grant et al 2012
338		11-27-13	1.0317	0.00281	1.04017	0.00368324	83.8049	1.0765	Grant et al 2012
339		11-27-14	1.0641	0.00202	1.08124	0.00279769	83.8587	1.034	Grant et al 2012
340		11-27-15	1.05922	0.00292	1.07562	0.00400192	86.505	1.278	Grant et al 2012
341		11-27-16	1.05885	0.00176	1.07523	0.00255637	86.8964	1.441	Grant et al 2012
342		11-27-17	1.0648	0.00237	1.08308	0.00331679	87.9188	1.185	Grant et al 2012
343		11-27-18	1.05848	0.00249	1.07503	0.00348456	88.1929	1.366	Grant et al 2012
344		11-27-19	1.06381	0.00234	1.08216	0.00325662	89.442	1.049	Grant et al 2012
345		11-27-20	1.06146	0.00226	1.0824	0.00338694	103.753	1.532	Grant et al 2012
346		11-27-21	1.06041	0.00297	1.081	0.00431085	103.756	1.436	Grant et al 2012
347		MN-5-1	1.07367	0.00145	1.09448	0.00225937	88.032	1.497	Grant et al 2012
348		MN-5-2	1.07233	0.00105	1.0932	0.00166086	89.689	1.169	Grant et al 2012
349		MN-5-3	1.07363	0.0012	1.09506	0.0018563	90.376	1.143	Grant et al 2012
350		MN-5-4	1.07096	0.00158	1.0919	0.00230783	91.495	1.007	Grant et al 2012
351		MN-5-5	1.07525	0.00116	1.09747	0.00208841	91.529	2.127	Grant et al 2012
352		4-2-118-1	1.09341	0.00167964	1.13097	0.00333441	119.563	2.646	Grant et al 2012
353		4-2-118-2	1.08045	0.000958701	1.11742	0.00260862	133.774	3.644	Grant et al 2012
354		5-1-118-1	1.08803	0.00152941	1.11061	0.00231787	80.8001	1.267	Grant et al 2012
355		5-2-118-2	1.09431	0.000894181	1.13344	0.00262263	122.795	3.599	Grant et al 2012
356		8-1-118-A	1.08114	0.00164554	1.12741	0.00364929	159.668	2.958	Grant et al 2012
357		6-4-24-1	1.18404	0.00122	1.23648	0.00276739	88.7107	1.795	Grant et al 2012
358		6-4-24-2	1.1672	0.00098	1.23375	0.00309173	118.549	2.606	Grant et al 2012
359		9-4-N-1	1.11272	0.00105	1.14776	0.00198276	95.7682	1.452	Grant et al 2012
360		9-4-N-2	1.1199	0.00108	1.17217	0.00311152	128.03	3.207	Grant et al 2012
361		2-22-1	1.04739	0.0019	1.06837	0.00310735	129.66	1.896	Grant et al 2012
362		2-22-2	1.04483	0.00123	1.06544	0.00209126	133.839	1.599	Grant et al 2012
363		2-22-3	1.04808	0.00134	1.07023	0.00232401	134.073	1.847	Grant et al 2012
364		2-22-4	1.05893	0.00112	1.08612	0.00205179	134.239	1.705	Grant et al 2012
365		2-22-5	1.0552	0.00173	1.08162	0.00302336	138.385	2.017	Grant et al 2012
366		2-22-6	1.05667	0.00175	1.08479	0.00320165	142.559	2.434	Grant et al 2012
367		2-22-7	1.05767	0.00111	1.08709	0.0022897	145.848	2.492	Grant et al 2012
368		2-22-8	1.0546	0.00123	1.08252	0.00220732	146.151	1.493	Grant et al 2012
369		2-22-9	1.04919	0.0014	1.07484	0.00244607	148.487	1.494	Grant et al 2012
370		2-22-10	1.05293	0.00099	1.0809	0.00175506	150.128	1.0575	Grant et al 2012
371		2-22-11	1.05824	0.00192	1.08947	0.00366109	151.893	2.814	Grant et al 2012
372		2-22-12	1.05059	0.00193	1.07787	0.00403286	152.611	4.824	Grant et al 2012
373		2-22-13	1.05102	0.00081	1.07862	0.00160734	153.009	1.616	Grant et al 2012
374		2-22-14	1.0492	0.00136	1.07586	0.00245647	153.226	1.676	Grant et al 2012
375		2-22-15	1.06364	0.00086	1.09837	0.00177609	154.081	1.607	Grant et al 2012
376		2-22-16	1.05317	0.00121	1.08261	0.00265709	155.907	3.328	Grant et al 2012
377		2-22-17	1.05289	0.00157	1.08238	0.00329434	156.778	3.646	Grant et al 2012
378		2-22-18	1.0595	0.00135	1.09267	0.00300328	156.781	3.438	Grant et al 2012
379		2-22-19	1.05172	0.00187	1.08071	0.00398234	157.435	4.665	Grant et al 2012
380		2-22-20	1.06702	0.0013	1.10486	0.00250809	158.367	1.6	Grant et al 2012
381		2-22-21	1.06004	0.00085	1.09377	0.00163953	157.76	1.177	Grant et al 2012
382		2-22-22	1.05249	0.00228	1.08225	0.00432568	158.916	3.2385	Grant et al 2012
383		2-22-23	1.05084	0.0009	1.07989	0.00170039	159.924	1.267	Grant et al 2012
384		2-22-24	1.05796	0.00057	1.09129	0.00124478	160.727	1.345	Grant et al 2012
385		2-22-25	1.069	0.00073	1.10872	0.00158661	160.882	1.42	Grant et al 2012
386		2-3-1	1.02679	0.00156	1.02699	0.00158182	2.613	0.1345	Grant et al 2012
387		2-3-2	1.02034	0.00136	1.02062	0.00138578	4.786	0.1245	Grant et al 2012
388		2-3-3	1.01842	0.00158	1.01868	0.00162169	4.945	0.3685	Grant et al 2012
389		2-3-4	1.02017	0.00115	1.02047	0.00118156	5.14483	0.2545	Grant et al 2012
390		2-3-5	1.02082	0.00191	1.02113	0.00194824	5.161	0.1705	Grant et al 2012
391		2-3-6	1.01534	0.00153	1.01557	0.00156244	5.22	0.2205	Grant et al 2012
392		2-3-7	1.01702	0.00093	1.01727	0.000950757	5.212	0.1425	Grant et al 2012
393		2-3-8	1.01704	0.00163	1.0173	0.00166696	5.422	0.2411	Grant et al 2012
394		2-3-9	1.0194	0.0032	1.0198	0.00328308	7.301	0.2923	Grant et al 2012
395		2-20-9	1.01672	0.0019	1.01704	0.00194478	6.65702	0.1805	Grant et al 2012
396		2-20-10	1.01897	0.00171	1.01934	0.00175127	6.8165	0.1465	Grant et al 2012
397		2-20-11	1.01424	0.00077	1.01453	0.000793591	7.24502	0.1865	Grant et al 2012
398		2-20-12	1.02433	0.00212	1.02485	0.00224743	7.54612	1.16325	Grant et al 2012
399		2-20-13	1.02004	0.0015	1.02049	0.00154799	7.918	0.2425	Grant et al 2012
400		2-20-14	1.01892	0.00117	1.01935	0.00121034	7.96586	0.2505	Grant et al 2012
401		2-20-15	1.01833	0.00107	1.01876	0.00110369	8.16132	0.1645	Grant et al 2012
402		2-20-16	1.02115	0.00103	1.02165	0.0010672	8.216	0.2125	Grant et al 2012
403		2-20-17	1.02148	0.00111	1.02199	0.00117754	8.331	0.6611	Grant et al 2012
404		2-20-18	1.01927	0.00136	1.01973	0.00142001	8.375	0.492	Grant et al 2012
405		2-20-19	1.02284	0.0021	1.0234	0.00219694	8.557	0.6885	Grant et al 2012
406		2-20-20	1.02383	0.00154	1.02442	0.00159705	8.67863	0.2725	Grant et al 2012
407		2-20-21	1.02693	0.00186	1.0276	0.00193385	8.7292	0.3511	Grant et al 2012
408		2-20-22	1.02638	0.00216	1.02704	0.00223428	8.747	0.2645	Grant et al 2012
409		2-20-23	1.02276	0.00108	1.02333	0.00111755	8.81064	0.1565	Grant et al 2012
410		2-20-24	1.02494	0.00139	1.02557	0.00144749	8.81105	0.3105	Grant et al 2012
411		2-20-25	1.02936	0.00166	1.0301	0.00172318	8.84854	0.2485	Grant et al 2012
412		2-20-26	1.01969	0.00132	1.02019	0.00139518	8.887	0.7291	Grant et al 2012
413		2-20-27	1.02863	0.00256	1.02937	0.00264939	9.02002	0.2805	Grant et al 2012
414		2-20-28	1.02244	0.00129	1.02302	0.00134135	9.06691	0.2745	Grant et al 2012
415		2-20-29	1.02559	0.00098	1.02626	0.0010269	9.187	0.2845	Grant et al 2012
416		2-20-30	1.02765	0.00142	1.02838	0.00147769	9.20634	0.2525	Grant et al 2012
417		2-20-31	1.02801	0.00148	1.02875	0.00154485	9.271	0.3145	Grant et al 2012
418		2-20-32	1.02958	0.00197	1.03038	0.00204799	9.401	0.2905	Grant et al 2012
419		2-20-33	1.02763	0.00162	1.02838	0.00167689	9.418	0.1645	Grant et al 2012
420		2-20-34	1.02769	0.00148	1.02845	0.00157381	9.52582	0.6645	Grant et al 2012
421		2-20-35	1.02879	0.00154	1.02958	0.00159878	9.599	0.1965	Grant et al 2012
422		2-20-36	1.02572	0.00086	1.02643	0.000918289	9.63469	0.4625	Grant et al 2012
423		2-20-37	1.03057	0.00188	1.03141	0.00194704	9.636	0.1705	Grant et al 2012
424		2-20-38	1.0276	0.00192	1.02837	0.00200362	9.7688	0.3725	Grant et al 2012
425		2-20-39	1.02637	0.00134	1.0271	0.0013942	9.71746	0.2205	Grant et al 2012
426		2-20-40	1.0319	0.00121	1.03284	0.00126025	10.2935	0.1565	Grant et al 2012
427		2-20-41	1.02668	0.00164	1.02748	0.00171544	10.448	0.3385	Grant et al 2012
428		2-20-42	1.02797	0.0009	1.02886	0.000956732	11.081	0.3445	Grant et al 2012
429		2-20-43	1.0388	0.00151	1.04006	0.00160104	11.319	0.3705	Grant et al 2012
430		2-20-44	1.03584	0.00077	1.03703	0.000824821	11.603	0.2785	Grant et al 2012
431		2-20-45	1.03205	0.00091	1.03313	0.000967217	11.7081	0.2841	Grant et al 2012
432		2-20-46	1.0345	0.00097	1.03568	0.00102931	11.9201	0.2585	Grant et al 2012
433		2-20-47	1.04606	0.00149	1.04766	0.00156934	12.089	0.2045	Grant et al 2012
434		2-20-48	1.03541	0.00098	1.03665	0.00106375	12.133	0.4785	Grant et al 2012
435		2-20-49	1.04523	0.00147	1.04685	0.00156365	12.425	0.3105	Grant et al 2012
436		2-20-50	1.04017	0.00126	1.04162	0.00135212	12.545	0.3965	Grant et al 2012
437		2-20-51	1.04243	0.00128	1.04398	0.00139977	12.66	0.5885	Grant et al 2012
438		2-20-52	1.04382	0.00143	1.04542	0.00151087	12.71	0.2225	Grant et al 2012
439		2-N-1	1.03415	0.0011	1.03444	0.00112299	2.98474	0.1405	Grant et al 2012
440		2-N-2	1.03415	0.0011	1.03447	0.00111714	3.30591	0.0699	Grant et al 2012
441		2-N-3	1.02406	0.0011969	1.02437	0.00122342	4.5466	0.1603	Grant et al 2012
442		2-N-4	1.03437	0.00127872	1.03483	0.00130372	4.64296	0.0824	Grant et al 2012
443		2-N-5	1.01753	0.00113272	1.0178	0.00116113	5.40593	0.2182	Grant et al 2012
444		2-N-6	1.01523	0.0013034	1.01547	0.00133129	5.4997	0.1709	Grant et al 2012
445		2-N-7	1.02752	0.00168605	1.02795	0.00173246	5.53022	0.2513	Grant et al 2012
446		2-N-8	1.01891	0.00119503	1.01922	0.00122207	5.6576	0.1433	Grant et al 2012
447		2-N 9	1.01923	0.00152283	1.01955	0.00155629	5.71234	0.1571	Grant et al 2012
448		2-N-10	1.03138	0.000898134	1.0319	0.000939048	5.73034	0.2912	Grant et al 2012
449		2-N-11	1.03018	0.00151453	1.03067	0.00155924	5.80901	0.2265	Grant et al 2012
450		2-N-12	1.03226	0.00120461	1.03279	0.00124662	5.82495	0.2375	Grant et al 2012
451		2-N-13	1.01733	0.00134854	1.01763	0.00138117	6.04079	0.1889	Grant et al 2012
452		2-N-14	1.02915	0.00149407	1.02965	0.0015397	6.0833	0.2353	Grant et al 2012
453		2-N-15	1.02816	0.00151942	1.02866	0.00155996	6.18899	0.1695	Grant et al 2012
454		2-N 16	1.04713	0.00150215	1.04798	0.00156828	6.31245	0.2882	Grant et al 2012
455		2-N-17	1.0192	0.00131416	1.01956	0.00135337	6.44918	0.272	Grant et al 2012
456		2-N-18	1.02667	0.00434	1.0272	0.00445656	6.955	0.3955	Grant et al 2012
457		2-N-19	1.01847	0.00141822	1.01885	0.00146236	7.35281	0.2695	Grant et al 2012
458		2-N-20	1.03387	0.00152151	1.03464	0.00159647	7.9069	0.4145	Grant et al 2012
459		2-N-21	1.02785	0.00077	1.02852	0.000819679	8.41153	0.3865	Grant et al 2012
460		2-N-22	1.04329	0.00237	1.04437	0.00251159	8.73762	0.6565	Grant et al 2012
461		2-N-23	1.02718	0.00233	1.0279	0.00241707	9.215	0.3245	Grant et al 2012
462		2-N-24	1.03065	0.0032	1.03147	0.0033079	9.30439	0.2545	Grant et al 2012
463		2-N-25	1.03814	0.00128501	1.03918	0.00134878	9.47014	0.2611	Grant et al 2012
464		2-N-26	1.05584	0.00184	1.05737	0.00194135	9.55255	0.3145	Grant et al 2012
465		2-N-27	1.01607	0.00134842	1.01651	0.00139871	9.58361	0.2843	Grant et al 2012
466		2-N-28	1.02821	0.00281	1.02899	0.00291118	9.59206	0.2925	Grant et al 2012
467		2-N-29	1.03399	0.00091583	1.03493	0.000955783	9.61719	0.1491	Grant et al 2012
468		2-N-30	1.04236	0.00126566	1.04363	0.00135011	10.4661	0.3767	Grant et al 2012
469		2-N 31	1.03186	0.0012426	1.03282	0.00129693	10.5706	0.1794	Grant et al 2012
470		2-N-32	1.01829	0.000588537	1.01887	0.000623005	11.1387	0.2933	Grant et al 2012
471		2-N-33	1.03696	0.00199128	1.03821	0.00213112	11.8229	0.6683	Grant et al 2012
472		2-N-34	1.04932	0.00114	1.05107	0.00126984	12.3699	0.6185	Grant et al 2012
473		2-N-35	1.04638	0.00125224	1.04805	0.00133473	12.47	0.2767	Grant et al 2012
474		2-N-36	1.04747	0.00162711	1.04922	0.0017457	12.8662	0.4193	Grant et al 2012
475		2-N-37	1.0625	0.0021	1.06514	0.00224133	14.6139	0.2867	Grant et al 2012
476		2-N-38	1.05472	0.00175	1.05709	0.00190718	14.999	0.5045	Grant et al 2012
477		2-N-39	1.05566	0.00128956	1.05811	0.00139777	15.2816	0.3123	Grant et al 2012
478		2-N-40	1.05795	0.00106528	1.06053	0.00116672	15.3703	0.3165	Grant et al 2012
479		2-N-41	1.06128	0.000699999	1.06402	0.000838715	15.4483	0.594	Grant et al 2012
480		2-N-42	1.05845	0.00208	1.06113	0.00225851	15.848	0.4817	Grant et al 2012
481		2-N-43	1.05889	0.00110695	1.06164	0.00120034	16.1123	0.24	Grant et al 2012
482		2-N-44	1.0641	0.00212	1.06729	0.00228931	17.1839	0.3355	Grant et al 2012
483		2-N-45	1.07005	0.00198514	1.07365	0.00214553	17.7288	0.2805	Grant et al 2012
484		2-N-46	1.06727	0.00146	1.07076	0.00167802	17.8712	0.712	Grant et al 2012
485		2-N-47	1.07316	0.00118329	1.07701	0.00131113	18.1793	0.3007	Grant et al 2012
486		2-N-48	1.84674	0.00278924	1.89246	0.00448226	18.606	0.6115	Grant et al 2012
487		2-N-49	1.06148	0.00120977	1.06481	0.00140065	18.6806	0.684	Grant et al 2012
488		2-N-50	1.06596	0.00243255	1.06987	0.00277868	20.3979	1.0217	Grant et al 2012
489		2-N-51	1.07401	0.00176898	1.07876	0.00196132	22.0323	0.3535	Grant et al 2012
490		2-N-52	1.07258	0.00152	1.07728	0.0016735	22.183	0.2525	Grant et al 2012
491		2-N-53	1.07111	0.00146886	1.07578	0.00169047	22.518	0.584	Grant et al 2012
492		2-N-54	1.07407	0.00182229	1.07932	0.00206622	24.1875	0.513	Grant et al 2012
493		2-N-55	1.06448	0.00113587	1.06987	0.00141943	28.4134	0.955	Grant et al 2012
494		2-N-56	1.06756	0.00100996	1.07335	0.00124042	29.1043	0.694	Grant et al 2012
495		2-N-57	1.05883	0.000797159	1.0641	0.000998525	30.3085	0.718	Grant et al 2012
496		2-N-58	1.06262	0.000888033	1.06836	0.00113281	31.0061	0.846	Grant et al 2012
497		2-41-1	1.02927	0.00142	1.02979	0.00146334	6.20156	0.2165	Grant et al 2012
498		2-41-2	1.0716	0.00154	1.0757	0.00169274	19.69	0.302	Grant et al 2012
499		2-41-3	1.08335	0.0018	1.08977	0.00205017	26.2352	0.44	Grant et al 2012
500		2-41-4	1.08067	0.0009	1.08757	0.00107113	29.0305	0.3805	Grant et al 2012
501		2-41-5	1.08786	0.00128	1.09565	0.00147127	30.039	0.288	Grant et al 2012
502		1-4-1	1.03437	0.00137	1.0353	0.00143178	9.476	0.2465	Grant et al 2012
503		1-4-2	1.07592	0.00172	1.08055	0.00187637	20.951	0.226	Grant et al 2012
504		1-4-3	1.07731	0.00229	1.08212	0.00261816	21.356	0.8	Grant et al 2012
505		1-4-4	1.07274	0.00167	1.07758	0.00195338	22.778	0.786	Grant et al 2012
506		1-4-5	1.07529	0.00146	1.08055	0.00163824	23.912	0.3345	Grant et al 2012
507		1-4-6	1.07836	0.00126	1.08412	0.00157725	25.086	0.945	Grant et al 2012
508		1-4-7	1.07824	0.00099	1.08399	0.0012144	25.08	0.639	Grant et al 2012
509		1-4-9	1.081	0.00132	1.08751	0.00154613	27.371	0.485	Grant et al 2012
510		1-4-10	1.06771	0.00191	1.07411	0.00216089	31.952	0.336	Grant et al 2012
511		1-4-11	1.06898	0.00136	1.07607	0.00188022	34.634	1.769	Grant et al 2012
512		1-4-12	1.07206	0.00236	1.07949	0.00266805	34.722	0.288	Grant et al 2012
513		1-4-13	1.07022	0.00193	1.07748	0.00223121	34.821	0.464	Grant et al 2012
514		1-4-14	1.06567	0.00181	1.07248	0.00208114	34.905	0.4075	Grant et al 2012
515		1-4-15	1.06739	0.0033	1.0751	0.00396599	38.343	1.358	Grant et al 2012
516		2-21-1	1.0406	0.00249	1.0418	0.00268273	10.32	1.00745	Grant et al 2012
517		2-21-2	1.07084	0.0015	1.07642	0.00169893	26.804	0.3745	Grant et al 2012
518		2-21-3	1.0688	0.00156	1.07623	0.00184835	36.302	0.556	Grant et al 2012
519		2-21-4	1.07311	0.00198	1.0817	0.00231603	39.297	0.448	Grant et al 2012
520		2-21-5	1.05843	0.00205	1.0653	0.00243012	39.321	0.754	Grant et al 2012
521		2-21-6	1.07369	0.00248	1.08267	0.00291251	40.675	0.558	Grant et al 2012
522		2-21-7	1.07055	0.0027	1.07928	0.00313777	41.269	0.463	Grant et al 2012
523		2-21-8	1.06943	0.00201	1.07828	0.00237732	42.456	0.502	Grant et al 2012
524		2-21-9	1.06833	0.00179	1.07729	0.00214114	43.5942	0.533	Grant et al 2012
525		2-21-10	1.06113	0.00264	1.06922	0.0031573	43.9596	0.859	Grant et al 2012
526		2-21-11	1.06498	0.00181	1.07386	0.00218512	45.3234	0.612	Grant et al 2012
527		2-21-12	1.06878	0.00127	1.07831	0.00162609	45.9039	0.814	Grant et al 2012
528		2-21-13	1.06246	0.00152	1.07136	0.00183508	47.147	0.488	Grant et al 2012
529		2-21-14	1.06448	0.00208	1.07369	0.00251888	47.261	0.68	Grant et al 2012
530		2-21-15	1.06417	0.00244	1.07343	0.00289901	47.71	0.5145	Grant et al 2012
531		2-21-16	1.06112	0.00153	1.07017	0.00184127	48.864	0.427	Grant et al 2012
532		2-21-17	1.06252	0.00147	1.07196	0.00181448	49.772	0.602	Grant et al 2012
533		2-21-18	1.05701	0.00165	1.06568	0.00199175	50.064	0.49	Grant et al 2012
534		2-21-19	1.05226	0.0031	1.06043	0.0037142	51.371	0.76	Grant et al 2012
535		2-21-20	1.05725	0.00119	1.0664	0.00145067	52.439	0.376	Grant et al 2012
536		2-21-21	1.05874	0.00134	1.06813	0.00164367	52.454	0.465	Grant et al 2012
537		2-21-22	1.06629	0.00142	1.07699	0.00178882	52.928	0.642	Grant et al 2012
538		2-21-23	1.06771	0.00186	1.07901	0.00232044	54.603	0.672	Grant et al 2012
539		2-8-1	1.03314	0.0023	1.03416	0.00240825	10.7754	0.3845	Grant et al 2012
540		2-8-2	1.03539	0.00158	1.03651	0.00166944	11.0598	0.3805	Grant et al 2012
541		2-8-3	1.04948	0.00146	1.05127	0.00156585	12.5575	0.3665	Grant et al 2012
542		2-8-4	1.04474	0.00199	1.04638	0.00214567	12.7064	0.6325	Grant et al 2012
543		10-44-1	1.04659	0.0019	1.04816	0.00201441	11.7415	0.3695	Grant et al 2012
544		10-44-2	1.04985	0.000765025	1.05171	0.000832373	12.9749	0.2653	Grant et al 2012
545		10-44-3	1.05781	0.00144653	1.05999	0.00152715	13.0881	0.154	Grant et al 2012
546		10-44-4	1.05343	0.00105992	1.05549	0.00114367	13.3843	0.2735	Grant et al 2012
547		10-44-5	1.05337	0.0011782	1.05544	0.00126727	13.409	0.278	Grant et al 2012
548		10-44-6	1.06078	0.00112	1.06319	0.00122444	13.764	0.336	Grant et al 2012
549		10-44-7	1.04731	0.00117921	1.0492	0.00126228	13.864	0.2585	Grant et al 2012
550		10-44-8	1.06399	0.000982181	1.06659	0.00105047	14.0745	0.1511	Grant et al 2012
551		10-44-9	1.05541	0.000888565	1.05777	0.000979065	14.7212	0.3231	Grant et al 2012
552		10-44-10	1.05626	0.000869255	1.05869	0.000939952	14.9519	0.2	Grant et al 2012
553		10-44-11	1.05476	0.000269131	1.05714	0.000297724	15.0775	0.1045	Grant et al 2012
554		10-44-12	1.05748	0.000891783	1.06	0.000951987	15.1923	0.1243	Grant et al 2012
555		10-44-13	1.04938	0.00252962	1.0516	0.00268861	15.5192	0.3125	Grant et al 2012
556		10-44-14	1.06278	0.000479699	1.06567	0.000533609	15.9209	0.1715	Grant et al 2012
557		10-44-15	1.06419	0.00119254	1.06718	0.00127037	16.1442	0.1167	Grant et al 2012
558		10-44-16	1.06915	0.00306604	1.07246	0.00325423	16.5535	0.2019	Grant et al 2012
559		10-44-17	1.06828	0.00116132	1.07164	0.0012718	17.0025	0.2633	Grant et al 2012
560		10-44-18	1.06432	0.000852376	1.06765	0.000917042	17.8158	0.108	Grant et al 2012
561		10-44-19	1.06798	0.00102358	1.07181	0.00111852	19.4	0.1835	Grant et al 2012
562		10-44-20	1.06972	0.00132	1.07377	0.00147276	19.9584	0.3653	Grant et al 2012
563		10-44-21	1.06483	0.000942793	1.06871	0.00102307	20.5892	0.1225	Grant et al 2012
564		10-44-22	1.07872	0.00086	1.08429	0.00103432	24.172	0.4765	Grant et al 2012
565		7-43-1	1.09068	0.00148	1.0954	0.00163488	17.9653	0.2885	Grant et al 2012
566		7-43-2	1.08959	0.00132	1.09492	0.00153065	20.4463	0.4925	Grant et al 2012
567		7-43-3	1.05041	0.00141	1.05622	0.00166704	38.6272	0.594	Grant et al 2012
568		7-43-4	1.05999	0.00132	1.06863	0.00156942	47.5958	0.306	Grant et al 2012
569		119-7-1	1.05825	0.0020482	1.06129	0.00243492	17.9811	1.616	Grant et al 2012
570		119-7-2	1.05414	0.00121854	1.0601	0.0015386	36.9725	1.094	Grant et al 2012
571		119-7-3	1.05283	0.000918072	1.05907	0.00118464	39.511	0.947	Grant et al 2012
572		119-7-4	1.06424	0.00238566	1.07244	0.00289426	42.4713	0.998	Grant et al 2012
573		119-7-5	1.06387	0.00155519	1.07233	0.00190338	43.9945	0.696	Grant et al 2012
574		119-7-6	1.06132	0.00121435	1.06978	0.00145822	45.7796	0.386	Grant et al 2012
575		119-7-7	1.05449	0.0012702	1.0621	0.00161146	46.2788	0.933	Grant et al 2012
576		119-7-8	1.06561	0.000907205	1.07489	0.00126603	46.8095	1.089	Grant et al 2012
577		119-7-9	1.06586	0.00107202	1.07537	0.00151638	47.7413	1.359	Grant et al 2012
578		119-7-10	1.05302	0.00114807	1.06073	0.00151622	48	1.173	Grant et al 2012
579		119-7-11	1.05889	0.00126215	1.06768	0.00168934	49.1977	1.249	Grant et al 2012
580		119-7-12	1.06025	0.00120442	1.06927	0.00160184	49.3551	1.109	Grant et al 2012
581		119-7-13	1.06111	0.0014024	1.07032	0.00188516	49.6891	1.365	Grant et al 2012
582		119-7-14	1.06221	0.00162719	1.07381	0.00220851	60.4651	1.333	Grant et al 2012
583		119-7-15	1.0499	0.00117828	1.05956	0.00164791	62.6006	1.435	Grant et al 2012
584		119-7-16	1.06856	0.00155542	1.08211	0.00221131	63.7941	1.502	Grant et al 2012
585		119-7-17	1.07105	0.000958425	1.08576	0.00149869	66.5975	1.41	Grant et al 2012
586		119-7-18	1.05926	0.00163534	1.07206	0.00234246	69.2444	1.736	Grant et al 2012
587		119-7-19	1.05285	0.00185192	1.06462	0.00245856	71.095	1.065	Grant et al 2012
588		119-7-20	1.04552	0.00215301	1.0558	0.00280162	72.0579	1.029	Grant et al 2012
589		119-7-21	1.04969	0.00101364	1.06093	0.00171776	72.1605	2.757	Grant et al 2012
590		119-7-23	1.04329	0.00224135	1.05339	0.00292097	74.1463	1.041	Grant et al 2012
591		119-7-24	1.04601	0.00124998	1.05674	0.00177659	74.2028	1.465	Grant et al 2012
592		119-7-25	1.02189	0.000934509	1.02756	0.00137065	81.5489	2.489	Grant et al 2012
593		119-7-26	1.02616	0.00108886	1.03343	0.00169241	86.7304	3.186	Grant et al 2012
594		119-7-27	1.02831	0.0018626	1.03636	0.00261772	88.47	2.199	Grant et al 2012
595		10-41-1	1.07023	0.00086	1.0739	0.000971517	18.042	0.3185	Grant et al 2012
596		10-41-2	1.06804	0.00108	1.07163	0.00118082	18.196	0.2165	Grant et al 2012
597		10-41-3	1.06876	0.00127	1.07526	0.00145936	31.951	0.326	Grant et al 2012
598		10-41-4	1.57022	0.00155	1.80165	0.00601721	120.529	1.694	Grant et al 2012
599		10-43-1	1.09485	0.00129	1.10023	0.00148286	19.5212	0.4225	Grant et al 2012
600		10-43-2	1.05041	0.00141	1.05622	0.001668	38.6272	0.6	Grant et al 2012
601		10-45-1	1.07392	0.00207	1.07923	0.00242458	24.5254	0.92	Grant et al 2012
602		10-45-2	1.07132	0.00213	1.07832	0.00257494	33.1447	1.065	Grant et al 2012
603		10-45-3	1.06011	0.00107	1.06689	0.00126255	37.82	0.38	Grant et al 2012
604		10-45-4	1.06306	0.00137	1.0703	0.00161242	38.474	0.428	Grant et al 2012
605		10-45-5	1.06052	0.00112	1.0676	0.00135787	39.157	0.559	Grant et al 2012
606		4-113-1	1.06901	0.0014457	1.07315	0.00163624	20.5715	0.503	Grant et al 2012
607		4-113-2	1.07196	0.00134208	1.07634	0.00151787	20.8605	0.437	Grant et al 2012
608		4-113-3	1.06649	0.000959912	1.0706	0.00110417	21.2165	0.4257	Grant et al 2012
609		4-113-4	1.08777	0.00199903	1.10438	0.00249755	61.3011	0.408	Grant et al 2012
610		4-113-5	1.06066	0.00124539	1.07419	0.00183018	71.2879	1.463	Grant et al 2012
611		5-7-113-1	1.1313	0.00236605	1.14235	0.0029974	28.5796	1.0745	Grant et al 2012
612		5-7-113-2	1.13543	0.000894067	1.14761	0.00117641	30.473	0.484	Grant et al 2012
613		5-7-113-3	1.13856	0.00167654	1.15393	0.00232636	37.2324	1.066	Grant et al 2012
614		5-7-113-4	1.11777	0.00181105	1.13123	0.00232801	38.2731	0.836	Grant et al 2012
615		1-6-1	1.06542	0.00094	1.07198	0.00106341	33.7977	0.1435	Grant et al 2012
616		1-6-2	1.06504	0.00075	1.07284	0.00087653	40.051	0.178	Grant et al 2012
617		1-6-3	1.05649	0.00201	1.0634	0.00251761	40.847	1.46	Grant et al 2012
618		1-6-4	1.06908	0.00217	1.07772	0.00267637	41.715	1.069	Grant et al 2012
619		1-6-5	1.06778	0.0019	1.07672	0.00226749	43.855	0.5385	Grant et al 2012
620		1-6-6	1.06603	0.00307	1.07478	0.00359799	44.015	0.574	Grant et al 2012
621		1-6-7	1.06438	0.00211	1.07336	0.00257886	46.195	0.842	Grant et al 2012
622		1-6-8	1.05942	0.00185	1.06886	0.00237653	52.175	1.195	Grant et al 2012
623		1-6-9	1.06452	0.00343	1.07485	0.00425702	52.552	1.313	Grant et al 2012
624		1-6-10	1.06192	0.00182	1.07197	0.00229455	53.24	0.88	Grant et al 2012
625		1-6-11	1.0618	0.00175	1.07231	0.00231751	55.588	1.32	Grant et al 2012
626		1-6-12	1.07518	0.00393	1.08834	0.00483505	57.066	0.87	Grant et al 2012
627		1-6-13	1.04718	0.00234	1.0568	0.0030206	65.683	1.266	Grant et al 2012
628		1-6-14	1.06052	0.00137	1.07369	0.00217427	69.665	2.43	Grant et al 2012
629		1-6-15	1.04878	0.00266	1.05941	0.00341106	69.731	1.022	Grant et al 2012
630		1-6-16	1.05977	0.0018	1.0728	0.00254105	69.759	1.695	Grant et al 2012
631		1-6-17	1.0637	0.0058	1.08103	0.00769414	85.126	1.382	Grant et al 2012
632		7-41-1	1.07641	0.0013	1.086	0.0016041	41.8263	0.58	Grant et al 2012
633		7-41-2	1.0757	0.0018	1.08552	0.00217825	43.15	0.599	Grant et al 2012
634		9-25-1	1.05912	0.0067	1.0679	0.00787327	48.9984	0.928	Grant et al 2012
635		9-25-2	1.0562	0.00249	1.06482	0.00299463	50.5064	0.669	Grant et al 2012
636		9-25-3	1.04677	0.00121	1.05416	0.00150443	51.921	0.674	Grant et al 2012
637		9-25-4	1.0528	0.00217	1.06122	0.00261397	52.351	0.566	Grant et al 2012
638		9-25-5	1.04964	0.00141	1.05757	0.00172312	52.439	0.54	Grant et al 2012
639		9-25-6	1.06693	0.0075	1.07778	0.00902879	53.16	1.423	Grant et al 2012
640		9-25-7	1.05257	0.00296	1.06128	0.00354727	54.246	0.559	Grant et al 2012
641		9-25-8	1.05619	0.00131	1.06567	0.00183815	55.152	1.655	Grant et al 2012
642		9-25-9	1.05622	0.000555678	1.06569	0.000822307	55.08	0.932	Grant et al 2012
643		9-25-10	1.05392	0.00218	1.06303	0.00277033	55.239	1.246	Grant et al 2012
644		9-25-11	1.05652	0.00239	1.06611	0.00304592	55.4749	1.339	Grant et al 2012
645		9-25-12	1.05653	0.00132	1.06617	0.0016405	55.717	0.51	Grant et al 2012
646		9-25-13	1.05125	0.00134	1.06002	0.00166419	55.902	0.559	Grant et al 2012
647		9-25-14	1.06093	0.00201	1.07137	0.00251024	55.945	0.773	Grant et al 2012
648		9-25-15	1.05727	0.0011039	1.06711	0.00136369	56.0848	0.37	Grant et al 2012
649		9-25-16	1.05655	0.00112	1.06627	0.00141116	56.106	0.527	Grant et al 2012
650		9-25-17	1.0553	0.00219	1.0648	0.0027076	56.115	0.771	Grant et al 2012
651		9-25-18	1.0587	0.00109607	1.06887	0.00139612	56.5302	0.566	Grant et al 2012
652		9-25-19	1.05577	0.00152	1.06545	0.0018518	56.645	0.367	Grant et al 2012
653		9-25-20	1.05602	0.00099	1.06577	0.00127836	56.7885	0.624	Grant et al 2012
654		9-25-21	1.05619	0.00104	1.06604	0.00132416	57.1333	0.546	Grant et al 2012
655		9-25-22	1.05594	0.00084	1.06575	0.00109129	57.144	0.56	Grant et al 2012
656		9-25-23	1.05508	0.00071	1.06477	0.000903685	57.318	0.376	Grant et al 2012
657		9-25-24	1.05554	0.00137	1.06537	0.00173113	57.667	0.642	Grant et al 2012
658		9-25-25	1.05212	0.00158	1.06139	0.00199192	57.933	0.754	Grant et al 2012
659		9-25-26	1.05538	0.0008	1.06524	0.00117914	57.959	1.284	Grant et al 2012
660		9-25-27	1.05744	0.00224	1.06773	0.00283166	58.3166	0.994	Grant et al 2012
661		9-25-28	1.0561	0.00106	1.06619	0.00134608	58.526	0.51	Grant et al 2012
662		9-25-29	1.05547	0.00173	1.06566	0.00219102	59.6629	0.772	Grant et al 2012
663		4-3-118-1	1.16978	0.00166251	1.19736	0.00272186	53.2548	1.415	Grant et al 2012
664		4-3-118-2	1.20905	0.00149244	1.24882	0.00290573	61.6134	1.606	Grant et al 2012
665		4-113-1	1.07776	0.00170003	1.09345	0.00252134	65.0212	1.811	Grant et al 2012
666		4-113-2	1.04572	0.00238799	1.05711	0.00319668	78.6934	1.325	Grant et al 2012
667		4-113-3	1.06976	0.00124186	1.08804	0.00210139	82.3649	2.146	Grant et al 2012
668		4-113-4	1.0567	0.00148224	1.07212	0.00229374	85.1281	2.003	Grant et al 2012
669		4-113-6-6	1.07094	0.000946795	1.09161	0.00149353	90.4843	1.046	Grant et al 2012
670		4-113-7	1.06689	0.00113195	1.08641	0.00200151	90.5885	2.208	Grant et al 2012
671		4-113-8	1.08321	0.0016251	1.12315	0.00321405	138.708	2.324	Grant et al 2012
672		4-113-9	1.0939	0.00143108	1.14259	0.00374056	147.806	3.889	Grant et al 2012
673		4-113-10	1.08705	0.00149065	1.12979	0.00370362	141.313	4.0375	Grant et al 2012
674		4-113-11	1.09003	0.000880725	1.13473	0.00224587	142.649	2.4365	Grant et al 2012
675		4-113-12	1.0894	0.00088164	1.13373	0.00319427	142.456	4.962	Grant et al 2012
676		SO-14-AA	1.1153	0.0015	1.13876	0.00207967	65.52	0.7	Kagan 2012
677		SO-32-A	1.1145	0.0012	1.12195	0.00138146	22.3	0.3	Kagan 2012
678		SO-32-B1	1.0898	0.0009	1.08986	0.000903176	0.25	0.01	Kagan 2012
679		SO-32-B2	1.0929	0.0018	1.09296	0.00181163	0.22	0.04	Kagan 2012
680		SO-32-B3	1.0859	0.0008	1.08593	0.000809986	0.12	0.04	Kagan 2012
681		SO-33-R	1.0737	0.0015	1.07905	0.00178765	24.8	0.8	Kagan 2012
682		SO-33-Q	1.0643	0.002	1.07169	0.00237174	38.5	0.7	Kagan 2012
683		SO-38-C2	1.0256	0.0008	1.02561	0.000800905	0.08	0.01	Kagan 2012
684		SO-38-C1	1.0293	0.0008	1.02932	0.000801258	0.19	0.01	Kagan 2012
685		SO-39-Y2	1.064	0.0011	1.07489	0.00145651	55.6	0.8	Kagan 2012
686		SO-44-A	1.0868	0.0017	1.10778	0.00238508	76.6	0.9	Kagan 2012
687		SO-51-Y	1.0487	0.0039	1.05087	0.004131	15.4	0.4	Kagan 2012
688		SO-51-M6	1.0639	0.0022	1.08009	0.00334597	79.9	2.6	Kagan 2012
689		SO-51-M5	1.0677	0.0021	1.08165	0.0030867	66.3	2.4	Kagan 2012
690		SO-52-W	1.008	0.0036	1.03095	0.0327571	478.7	184.6	Kagan 2012
691		SO-52-X	1.0122	0.0028	1.02922	0.00861196	309	22.9	Kagan 2012
692		SO-54-W	1.0361	0.0024	1.05217	0.00429476	130.3	5.6	Kagan 2012
693		SO-54-X	1.058	0.001	1.07875	0.00206998	108.2	3.2	Kagan 2012
694		SO-54-Y	1.0631	0.001	1.0778	0.0013869	74.1	0.7	Kagan 2012
695		SO-55-U2	1.0393	0.0018	1.05998	0.00322201	149.6	2.8	Kagan 2012
696		SO-55-V	1.0487	0.001	1.07412	0.00248571	148.6	4.6	Kagan 2012
697		SO-55-W	1.0593	0.0015	1.08512	0.00321193	127.9	4.4	Kagan 2012
698		SO-55-X'	1.0535	0.0014	1.07301	0.00240577	110	2.4	Kagan 2012
699		SO-55-X"	1.0407	0.0017	1.05236	0.0023496	89.1	1.1	Kagan 2012
700		SO-55-Y	1.0568	0.00087	1.06615	0.00108794	53.9	0.4	Kagan 2012
701		SO-55-4	1.0546	0.0023	1.07371	0.00404293	106.2	4.5	Kagan 2012
702		SO-55-3	1.0359	0.0011	1.04902	0.00244436	110.2	6.8	Kagan 2012
703		SO-56-W(upper)	1.0475	0.0022	1.06933	0.00358345	133.8	1.9	Kagan 2012
704		SO-56-V	1.0544	0.0028	1.085	0.00516789	157.9	3.3	Kagan 2012
705		SO-56-U(center)	1.0292	0.0039	1.04748	0.00713403	172	5.9	Kagan 2012
706		SO-56-T	1.0474	0.0033	1.08059	0.00670471	187.8	4.8	Kagan 2012
707		SO-56-S	1.0212	0.0011	1.03842	0.00262378	210.4	5.8	Kagan 2012
708		SO-56-R1	1.0122	0.0009	1.02225	0.00195592	212.6	5	Kagan 2012
709		SO-56-Q1	1.0177	0.0008	1.03531	0.0022446	244.3	6.5	Kagan 2012
710		SO-57-M	1.0228	0.002	1.02375	0.00211052	14.5	0.4	Kagan 2012
711		SO-57-N	1.0213	0.0016	1.04167	0.00505324	237.4	16.3	Kagan 2012
712		SO-57-S	1.0271	0.0014	1.03902	0.00232477	129	2.8	Kagan 2012
713		SO-57-T	1.0618	0.0022	1.08388	0.00341291	108.1	1.8	Kagan 2012
714		SO-57-U1	1.0318	0.0025	1.04013	0.0033362	82.3	1.6	Kagan 2012
715		SO-57-X	1.0605	0.0014	1.06935	0.00182038	48.3	1.1	Kagan 2012
716		SO-57-Y(mm)	1.0535	0.001	1.06339	0.00131021	60	0.7	Kagan 2012
717		SO-57-Y(ek)	1.0628	0.0013	1.07305	0.00171868	53.5	1	Kagan 2012
718		SO-58-X	1.0641	0.0013	1.07505	0.00162813	55.8	0.5	Kagan 2012
719		SO-58-Y	1.0387	0.0017	1.04479	0.00204342	51.7	0.6	Kagan 2012
720		SO-58-mac	1.0679	0.0018	1.07558	0.00211032	37.9	0.5	Kagan 2012
721		SO-59-X2	1.2469	0.0017	1.29203	0.00283613	59.4	1	Kagan 2012
722		SO-59-Y	1.1896	0.0016	1.20411	0.00183787	26.1	0.2	Kagan 2012
723		SO-60-S	1.1083	0.0008	1.16548	0.00276584	150	3.3	Kagan 2012
724		SO-60-T1	1.1264	0.0024	1.17703	0.0045123	119.2	2.3	Kagan 2012
725		SO-60-V1	1.1396	0.0017	1.18034	0.00316457	90.6	1.9	Kagan 2012
726		SO-60-W	1.1254	0.0009	1.16045	0.00219454	87.2	2.3	Kagan 2012
727		SO-60-X1	1.1598	0.0011	1.19487	0.00211247	70.2	1.4	Kagan 2012
728		SO-60-X2	1.146	0.0012	1.17524	0.00183661	64.6	0.8	Kagan 2012
729		SO-60-X	1.154	0.001	1.18849	0.00159685	71.5	0.7	Kagan 2012
730		SO-60-Y	1.1374	0.0039	1.14821	0.004542	26.8	0.8	Kagan 2012
731		SO-65-A	1.0992	0.0013	1.12107	0.00196305	70.5	1.1	Kagan 2012
732		SO-65-B	1.0919	0.0017	1.11071	0.00245483	65.9	1.3	Kagan 2012
733		SO-67-a	1.0561	0.002	1.0771	0.00340246	112.5	3	Kagan 2012
734		SO-67-b	1.0674	0.001	1.08081	0.00142735	64.2	1	Kagan 2012
735		SO-68-Q	1.1003	0.0011	1.1064	0.00137744	20.9	0.7	Kagan 2012
736		SO-68-R	1.0603	0.0029	1.06786	0.00368568	41.8	2.2	Kagan 2012
737		SO-68-Q'	1.1103	0.0011	1.11721	0.0012683	21.5	0.3	Kagan 2012
738		SO-68-R'	1.0485	0.0012	1.05311	0.00192944	32.1	4.1	Kagan 2012
739		SO-68-a	1.0986	0.0019	1.13736	0.0041611	117.3	3.9	Kagan 2012
740		SO-68-b	1.0911	0.0012	1.10209	0.00171987	40.3	1.3	Kagan 2012
741		SO-68-1-a	1.1175	0.0016	1.15017	0.00336065	86.8	3.1	Kagan 2012
742		SO-69-A	1.0355	0.0011	1.08085	0.00616481	291.2	16	Kagan 2012
743		SO-69-B	1.0345	0.0015	1.08689	0.00842637	326.8	18.9	Kagan 2012
744		SO-69-Q	1.014	0.0021	1.04166	0.0132893	385.8	58.8	Kagan 2012
745		SOpool-2b-a	1.0663	0.0022	1.07559	0.00272193	46.4	1	Kagan 2012
746		SOpool-2b-b	1.0579	0.0012	1.06572	0.00162201	44.8	1.4	Kagan 2012
747		1-4-Y	1.0717	0.0017	1.08331	0.00211655	53.1	0.6	Kagan 2012
748		1-4-Z	1.0355	0.0023	1.0406	0.0028026	47.5	1.5	Kagan 2012
749		1-6-A2	1.0654	0.0009	1.07196	0.00101055	33.8	0.1	Kagan 2012
750		1-6-B1	1.065	0.0008	1.0728	0.000937156	40.1	0.2	Kagan 2012
751		1-6-C1	1.0565	0.002	1.06341	0.00251327	40.8	1.5	Kagan 2012
752		1-6-C2	1.0691	0.0022	1.07774	0.00271689	41.7	1.1	Kagan 2012
753		7-41-crust	1.1224	0.002	1.12959	0.00226401	20.2	0.4	Kagan 2012
754		7-41-A	1.0754	0.001	1.08326	0.00122195	35.1	0.5	Kagan 2012
755		7-44-y	1.0541	0.0019	1.12807	0.0137111	304.9	25.4	Kagan 2012
756		10-41-A	1.068	0.0011	1.07159	0.00119853	18.2	0.2	Kagan 2012
757		10-41-TOP	1.0702	0.0009	1.07393	0.00101046	18.3	0.3	Kagan 2012
758		10-44-A	1.0466	0.0019	1.04817	0.00201833	11.7	0.4	Kagan 2012
759		10-45-A	1.0739	0.0021	1.07929	0.0024548	24.9	0.9	Kagan 2012
760		10-45B	1.0601	0.0011	1.06688	0.00129963	37.8	0.4	Kagan 2012
761		10-45-A-contact	1.0713	0.0021	1.07829	0.00254935	33.1	1.1	Kagan 2012
762		10-45-B-contact	1.0605	0.0011	1.06765	0.00134463	39.5	0.6	Kagan 2012
763		10-45-aa	1.0558	0.0021	1.06193	0.00245337	36.9	0.7	Kagan 2012
764		10-45-bb	1.0702	0.0016	1.07807	0.00211039	37.6	1.5	Kagan 2012
765		10-45-bb-crust	1.0622	0.0012	1.06894	0.00154436	36.4	1.1	Kagan 2012
766		2-21-A1	1.0406	0.0025	1.0418	0.00269199	10.3	1	Kagan 2012
767		2-21-A2	1.0708	0.0015	1.07637	0.00170437	26.8	0.4	Kagan 2012
768		2-21-A3	1.0688	0.0016	1.07632	0.0019043	36.7	0.6	Kagan 2012
769		2-21-B1	1.0584	0.0021	1.06535	0.00249779	39.8	0.8	Kagan 2012
770		2-22-A1-1	1.0448	0.0012	1.06539	0.00204723	133.8	1.6	Kagan 2012
771		2-22-A1-2	1.0474	0.0019	1.06839	0.00310855	129.7	1.9	Kagan 2012
772		2-22-A2	1.0481	0.0013	1.07027	0.00227643	134.1	1.9	Kagan 2012
773		2-22-A3	1.0589	0.0011	1.08607	0.00199659	134.2	1.6	Kagan 2012
774		2-22-A4	1.0552	0.0017	1.08162	0.0029752	138.4	2	Kagan 2012
775		2-22-B1	1.0567	0.0018	1.08484	0.00326899	142.6	2.4	Kagan 2012
776		2-22-B2	1.0577	0.0011	1.08712	0.00227658	145.8	2.5	Kagan 2012
777		2-22-B3(2004)	1.0546	0.0012	1.08254	0.00216391	146.2	1.5	Kagan 2012
778		2-22-b3(2006)	1.0582	0.0019	1.08941	0.00362641	151.9	2.8	Kagan 2012
779		2-22-B4	1.0508	0.0016	1.07606	0.00646362	142.8	18.9	Kagan 2012
780		4-41-A	1.073	0.0017	1.09984	0.00288956	110.8	2	Kagan 2012
781		4-1-118-C1	1.1032	0.0011	1.11759	0.00188493	46.2	1.9	Kagan 2012
782		4-113-3-2	1.0882	0.0012	1.1045	0.00239648	60	3.3	Kagan 2012
783		4-113-2-1	1.0607	0.0012	1.07425	0.0017827	71.3	1.5	Kagan 2012
784		4-113-1-1	1.0327	0.0017	1.07589	0.00936539	297.9	25.2	Kagan 2012
785		4-113-1-2	1.0176	0.0018	1.04175	0.0283964	305.6	189.9	Kagan 2012
786		4-113-5-1	1.072	0.0013	1.07636	0.00146504	20.8	0.4	Kagan 2012
787		8-1-118-A	1.0811	0.0016	1.12736	0.00467296	159.7	6	Kagan 2012
788		8-2-118-A	1.0701	0.0017	1.0867	0.00264171	75.2	2.2	Kagan 2012
789		119-5-A	1.0759	0.0015	1.07863	0.00166506	12.5	0.5	Kagan 2012
790		119-7a	1.05	0.0018	1.05416	0.00207236	28.3	0.8	Kagan 2012
791		1197E	1.0529	0.0019	1.06467	0.00252394	71.1	1.1	Kagan 2012
792		119-7-F	1.0455	0.0022	1.05578	0.00285492	72.1	1	Kagan 2012
793		119-7G	1.0433	0.0022	1.05339	0.00286344	74.1	1	Kagan 2012
794	Jerusalem West (JW)	AF12-3	1.044	0.007308	1.05544	0.00953804	81.8	2.1	Frumkin et al. 1999
795		AF12-4	1.052	0.007364	1.06947	0.0103001	102.5	2.35	Frumkin et al. 1999
796		AF12-8	1.045	0.007315	1.04855	0.00795321	26.9	0.44	Frumkin et al. 1999
797		AF12-9	1.033	0.007231	1.04097	0.00911529	76.5	1.2	Frumkin et al. 1999
798		AF12-10	1.055	0.007385	1.0598	0.00808755	29.63	0.34	Frumkin et al. 1999
799		AF12-11	1.033	0.007231	1.0338	0.0074118	8.51	0.05	Frumkin et al. 1999
800		AF12-12	1.064	0.007448	1.0662	0.00772234	11.94	0.1	Frumkin et al. 1999
801		AF12-13	1.052	0.007364	1.06243	0.00898968	64.66	0.845	Frumkin et al. 1999
802		AF12-17	1.059	0.007413	1.07339	0.00989493	77.2	3.25	Frumkin et al. 1999
803		AF12-18	1.052	0.007364	1.09708	0.0166912	220.9	10.7	Frumkin et al. 1999
804		AF12-23	1.078	0.007546	1.10348	0.0107127	100	2.4	Frumkin et al. 1999
805		AF12-25	1.046	0.007322	1.06754	0.0111136	135.9	1.9	Frumkin et al. 1999
806		AF12-26	1.035	0.007245	1.05378	0.0114828	152	2.3	Frumkin et al. 1999
807		AF12-27	1.006	0.007042	1.00887	0.0104852	138.5	2.75	Frumkin et al. 1999
808		AF12-30	1.063	0.007441	1.08346	0.0103057	99.5	1.9	Frumkin et al. 1999
809		AF12-F	0.998	0.006986	0.997012	0.0104186	142.06	2.27	Frumkin et al. 1999
810		AF12-K2	1.051	0.007357	1.07683	0.0115084	144.97	1.96	Frumkin et al. 1999
811		AF12-Z	1.042	0.007294	1.06314	0.0113063	144.22	1.915	Frumkin et al. 1999
812	Hartuv Quarry (HT)	AF14-3	1.162	0.008134	1.17521	0.00897566	27.74	0.36	Frumkin et al. 1999
813		AF14-A	1.115	0.007805	1.123	0.00956523	23.8	3.5	Frumkin et al. 1999
814		HT-9-A	1.1234	0.0024	1.1282	0.00252957	13.5	0.1	Kagan 2012
815		HT-9-B	1.1186	0.0022	1.12245	0.00234061	11.3	0.2	Kagan 2012
816		HT-10-A1	1.0869	0.0026	1.08904	0.0027143	8.6	0.2	Kagan 2012
817		HT-11-A	1.1054	0.0024	1.10672	0.00249036	4.4	0.2	Kagan 2012
818		HT-12-A1	1.1249	0.0018	1.12776	0.00187727	8	0.1	Kagan 2012
819		HT-14-A1-closer	1.0988	0.0034	1.10209	0.00359988	11.6	0.3	Kagan 2012
820		HT-18-E2	1.1386	0.0026	1.21528	0.00507279	155.8	1.7	Kagan 2012
821		HT-18-F1	1.1388	0.0038	1.1993	0.00613223	128	1.2	Kagan 2012
822	Ma'ale-Efrayim (ME)	ME-2-A1	1.1215	0.052	1.13451	0.0582925	36	1.9	Vaks et al 2003
823		ME-2-A2	1.0701	0.0178	1.08006	0.020623	47	1.3	Vaks et al 2003
824		ME-2-A3	1.0763	0.0096	1.09341	0.0120965	71.6	1.3	Vaks et al 2003
825		ME-2-B	1.0627	0.0088	1.09526	0.0142595	148	3.3	Vaks et al 2003
826		ME-2-C1	1.0723	0.011	1.11954	0.0212675	177.9	9.1	Vaks et al 2003
827		ME-3-A1	1.1141	0.0055	1.12508	0.00613518	32.5	0.3	Vaks et al 2003
828		ME-3-A2	1.0771	0.0041	1.08677	0.00481034	41.8	0.8	Vaks et al 2003
829		ME-3-B	1.0846	0.0042	1.09632	0.00489066	45.9	0.4	Vaks et al 2003
830		ME-3-C	1.1042	0.0074	1.11971	0.00867075	49.1	0.5	Vaks et al 2003
831		ME-3-D1	1.0865	0.004	1.10099	0.0047557	54.8	0.3	Vaks et al 2003
832		ME-3-D2	1.0797	0.0052	1.09548	0.00636419	63.9	0.5	Vaks et al 2003
833		ME-3-E	1.0843	0.0035	1.12336	0.00560973	134.7	1.4	Vaks et al 2003
834		ME-3-F	1.0968	0.0049	1.15129	0.00859914	158	2.2	Vaks et al 2003
835		ME-5-A1	1.0768	0.0106	1.09247	0.0132596	65.7	1.9	Vaks et al 2003
836		ME-5-A2	1.0918	0.0102	1.11457	0.0134427	78.4	2.2	Vaks et al 2003
837		ME-5-B	1.0599	0.01	1.09357	0.0178994	157.8	8.6	Vaks et al 2003
838		ME-5-A1	1.07602	0.00277	1.08736	0.00351669	49.21	1.35	Lisker et al. 2010
839		ME-5-A2.1	1.09671	0.00265	1.11808	0.00377615	70.63	1.62	Lisker et al. 2010
840		ME-5-A2.2	1.07887	0.0009	1.09665	0.00138694	71.92	1.04	Lisker et al. 2010
841		ME-5-B2	1.05979	0.00167	1.09357	0.00355261	158.48	3.55	Lisker et al. 2010
842		ME-5-B3	1.0733	0.00151	1.11428	0.00353963	157.12	3.67	Lisker et al. 2010
843		ME-5-C1	1.04162	0.00187	1.07567	0.00482056	211.51	6.64	Lisker et al. 2010
844		ME-5-C2	1.04564	0.00202	1.08528	0.00614302	221.19	9.82	Lisker et al. 2010
845		ME-5-C3	1.04813	0.00126	1.08949	0.00371893	219.44	5.44	Lisker et al. 2010
846		ME-5-D1	1.03881	0.00357	1.08759	0.0165896	288.01	34.26	Lisker et al. 2010
847		ME-5-D3	1.0224	0.00284	1.05241	0.0118329	300.77	34.75	Lisker et al. 2010
848		ME-5-D5	1.0332	0.00261	1.07225	0.0111703	275.14	26.78	Lisker et al. 2010
849		ME-7	1.1117	0.001	1.12412	0.00121642	37.3	0.3	Vaks et al 2003
850		ME-8	1.1036	0.0064	1.11561	0.00723977	38.8	0.3	Vaks et al 2003
851		ME-9-A	1.1942	0.0108	1.21603	0.0140297	37.7	3.3	Vaks et al 2003
852		ME-9-B	1.1401	0.011	1.21528	0.0202517	152	5.5	Vaks et al 2003
853		ME-12-out	1.04353	0.00263	1.04504	0.00288287	12.06	1.27	Lisker et al. 2010
854		ME-12-A1	1.08865	0.00092	1.09286	0.00103713	16.4	0.28	Lisker et al. 2010
855		ME-12-A2	1.10869	0.00191	1.11658	0.00220012	24.78	0.46	Lisker et al. 2010
856		ME-12-K7	1.09009	0.00196	1.11038	0.00319088	71.88	2.53	Lisker et al. 2010
857		ME-12-A	1.0966	0.0193	1.10133	0.0203301	16.9	0.3	Vaks et al 2003
858		ME-12-B	1.1166	0.016	1.12574	0.0174318	26.7	0.5	Vaks et al 2003
859		ME-12-C	1.0682	0.0044	1.0744	0.00486327	30.8	0.3	Vaks et al 2003
860		ME-12-D	1.0696	0.0032	1.0761	0.00358498	31.6	0.4	Vaks et al 2003
861		ME-12-E	1.1439	0.0062	1.15597	0.00694049	28.5	0.5	Vaks et al 2003
862		ME-12-F	1.0866	0.0035	1.09469	0.00393402	31.6	0.4	Vaks et al 2003
863		ME-12-G1	1.0827	0.0041	1.0905	0.00453798	31.9	0.2	Vaks et al 2003
864		ME-12-G2	1.1249	0.0563	1.13726	0.0634293	33.4	4	Vaks et al 2003
865		ME-12-H1	1.1071	0.0465	1.11921	0.0530746	37.9	3.9	Vaks et al 2003
866		ME-12-H2	1.0833	0.0387	1.09343	0.0441993	40.6	3	Vaks et al 2003
867		ME-12-I1	1.0965	0.0503	1.10723	0.0566209	37.3	2.4	Vaks et al 2003
868		ME-12-I2	1.0877	0.0051	1.09704	0.00578017	35.8	0.5	Vaks et al 2003
869		ME-12-I3	1.1013	0.0078	1.11282	0.00884624	38.1	0.5	Vaks et al 2003
870		ME-12-I4	1.0935	0.0044	1.10431	0.00496753	38.7	0.2	Vaks et al 2003
871		ME-12-J1	1.1052	0.0076	1.12048	0.00894262	48	0.7	Vaks et al 2003
872		ME-12-J2	1.1028	0.0063	1.11684	0.00768894	45.3	1.6	Vaks et al 2003
873		ME-12-J4	1.0816	0.0062	1.09503	0.00735452	53.9	0.5	Vaks et al 2003
874		ME-12-J5	1.072	0.0062	1.08509	0.00756764	59.1	1	Vaks et al 2003
875		ME-12-K3	1.0969	0.0049	1.11533	0.00619042	61.6	1.1	Vaks et al 2003
876		ME-12-K4	1.1321	0.007	1.15537	0.00849638	57.4	0.6	Vaks et al 2003
877		ME-12-K5	1.0998	0.0052	1.11925	0.00651679	63	0.9	Vaks et al 2003
878		ME-12-K7	1.0967	0.0046	1.11512	0.00570412	61.7	0.7	Vaks et al 2003
879	Small Ma'ale-Efrayim (MME)	MME-1-A	1.4444	0.042	1.65343	0.0782126	136.4	8.9	Vaks et al 2003
880	Kana'im (KN)	KN-1-A1	1.0313	0.0011	1.03421	0.00122356	31.46	0.22	Lisker et al. 2010
881		KN-1-A2	0.95736	0.00086	0.93818	0.000881688	131.42	2.09	Lisker et al. 2010
882		KN-1-B1	0.99768	0.00112	0.995204	0.00223418	256.93	6	Lisker et al. 2010
883		KN-6-A1	0.9787	0.00125	0.966956	0.00173375	155.37	2.2	Lisker et al. 2010
884		KN-8-B	1.00082	0.00104	1.00124	0.00158326	146.47	2.82	Lisker et al. 2010
885		KN-9-A1	1.0312	0.0073	1.03474	0.00822732	38.02	1.01	Lisker et al. 2010
886		KN-9-A2	0.95529	0.00121	0.933347	0.00153259	141.28	1.44	Lisker et al. 2010
887		KN-9-B	0.98943	0.00091	0.977958	0.00149305	260.04	6.5	Lisker et al. 2010
888		KN-10(1)-A1	1.01872	0.00147	1.03365	0.00300049	207.53	3.76	Lisker et al. 2010
889		KN-10(1)-A2	1.00671	0.00096	1.01352	0.00217415	247.93	6.26	Lisker et al. 2010
890		KN-10(1)-B1	1.00552	0.00204	1.0115	0.0044822	259.79	7.08	Lisker et al. 2010
891		KN-10(1)-B2	0.99754	0.00116	0.993859	0.0027305	323.66	9.57	Lisker et al. 2010
892		KN-10(1)-B3	0.99752	0.00126	0.993257	0.00306985	353.93	18.94	Lisker et al. 2010
893	Cave 81 (81)	Stalactite-S-81-II-1-A	1.08147	0.001	1.14483	0.00368538	203.56	4.66	Lisker et al. 2010
894		Stalactite-S-81-II-2-A	1.04102	0.00097	1.06597	0.00192373	168.14	1.95	Lisker et al. 2010
895		Stalactite S-81-II-3-A	1.03279	0.00729	1.03475	0.00775781	20.57	0.32	Lisker et al. 2010
896		Flowstone-S-81-II-4-A	1.0122	0.00711	1.01856	0.0110644	148.45	4.71	Lisker et al. 2010
897	Na'chal Ami'az (NA)	Stalactite-S-81-III-A	1.01302	0.00715	1.01407	0.00774109	27.34	0.42	Lisker et al. 2010
898		Stalactite SAM-1-A	1.20118	0.00214	1.20901	0.0023119	13.51	0.15	Lisker et al. 2010
899		Stalactite SAM-1-B	1.20273	0.01506	1.21044	0.0158466	13.2	0.36	Lisker et al. 2010
900		Stalactite SAM-2-A1	1.2006	0.0019	1.20857	0.00211104	13.78	0.23	Lisker et al. 2010
901		Stalactite SAM-2-A2	1.19665	0.00122	1.20447	0.00131472	13.79	0.08	Lisker et al. 2010
902		Stalactite SAM-2-B	1.18234	0.00105	1.19977	0.00122941	32.3	0.14	Lisker et al. 2010
903		Stalactite SAM-2-C	1.17169	0.00282	1.20136	0.00362033	56.4	0.55	Lisker et al. 2010
904		Stalactite SAM-5-A	1.20077	0.00117	1.2238	0.00160148	38.42	0.47	Lisker et al. 2010
Average all					1.08142	0.137854
Average Ma'ale-Meishar					1.10158	0.0271153
Average Ma'ale-Deragot					1.13168	0.0786715
Average Hartuv-Soreq					1.07394	0.120808
